# Supplementary material for: Analysis of the preferences for splice codes across tissues
Source: PubMed Central journal article supplement (PMC4656204; doi:10.1007/s13238-015-0226-5), 2015-10-27
Supplement: 13238_2015_226_MOESM1_ESM.pdf [file 13238_2015_226_MOESM1_ESM.pdf]

## Supplementary Text for "Analysis of the preferences for splice codes across tissues"

Tao Huang<sup>2\*#</sup>, Meng Wang<sup>2#</sup>, Yu-Dong Cai<sup>1\*</sup>

<sup>1</sup> College of Life Science, Shanghai University, Shanghai 200444, P.R. China

<sup>2</sup> Institute of Health Sciences, Shanghai Institutes for Biological Sciences, Chinese Academy of Sciences, Shanghai 200031, P.R. China

## Methods

### Dataset

We download the alternative splicing data in central nervous system (CNS), muscle, embryo, digestive tissues from <http://genes.toronto.edu/wasp/index.php?mode=dataset>. This dataset was compiled by Barash et al. (Barash et al., 2010) based on the alternative splicing microarray data from Fagnani et al. (Fagnani et al., 2007) which used probes to detect whether the known alternative splicing events of cassette exon happen in a specific tissue. Barash et al. analyzed the inclusion value matrix of 3,665 cassette exons in 27 tissues which were grouped in four tissue types, i.e. CNS, muscle, embryo, digestive tissues, with a model-based Expectation-Maximization (EM) algorithm to determine the increased exon inclusion, increased exon exclusion and no change probabilities (Barash et al., 2010). The status with greatest probability was assigned as the status of this cassette exon in this tissue type. This dataset has been widely used in many studies (Leung et al., 2014; Xiong et al., 2011) and became a well-recognized benchmark dataset for alternative splice researches.

To simplify the problem, we only try to predict whether a cassette exon will be alternative spliced or not. The numbers of these two kinds of cassette exons were shown in **Table S1**. The numbers of shared alternative spliced exons among four tissues were shown in **Figure S1**. To discriminate these two types of cassette exon, 1,014 features from Barash et al. (Barash et al., 2010) were adopted to represent the cassette exon. The features can be categorized into four types: 171 known motifs, 326 new motifs, 460 short motifs and 57 transcript structure features. The known motifs were reported to be near tissue regulated exons or associated with splicing factor binding preferences in literature (Barash et al., 2010). The new motifs were motifs with weak or no known evidence for roles in tissue-dependent splicing (Barash et al., 2010). The short motifs were region-specific 1-3-nucleotide (Barash et al., 2010). Transcript structure features characterized the spliced transcripts, such as exon and intron lengths (Barash et al., 2010). The complete feature list can be found in **Table S2**.

### Identify the features for tissue specific splicing of cassette exon

As shown in **Table S1**, most cassette exons were not alternative spliced. The number of non-alternative spliced cassette exons is roughly six times of the number of alternative spliced cassette exons. Therefore, we applied the procedures shown in **Figure S2** to reconstruct datasets with balanced non-alternative spliced cassette exons

and alternative spliced cassette exons, and analyzed the key features for discriminating these two types of exons on each dataset.

First, we equally divided the non-alternative spliced cassette exons into six parts and each part has similar number of non-alternative spliced cassette exons as the alternative spliced cassette exons. By combining the same alternative spliced cassette exons with different non-alternative spliced cassette exon parts, we compiled six datasets. In each dataset, the alternative spliced cassette exons were the same, i.e., all alternative spliced cassette exons in that tissue. But the non-alternative spliced cassette exons were different and had similar sample size with the alternative spliced cassette exons.

Then, on each balanced dataset, we utilized mRMR+IFS approach to identify the important features for predicting alternative spliced cassette exons. The mRMR+IFS approach will be described in the following sections.

At last, the identified features on each datasets were combined.

### **mRMR (minimal Redundancy Maximal Relevance) feature ranking**

To rank the important features that can help the classification of alternative spliced cassette exons and non- alternative spliced cassette exons, we applied mRMR (minimal Redundancy Maximal Relevance) (Peng et al., 2005) which is a widely used in bioinformatics (Niu et al., 2013; Zhao et al., 2013; Zhou et al., 2015). It considered both the redundancy between features and the relevance between features and exon classes.

Let's use  $\Omega$ ,  $\Omega_s$  and  $\Omega_t$  to represent all N features, the selected m features, the to-be-selected n features. The relevance of the feature  $f$  from  $\Omega_t$  with exon class  $c$  is measured with mutual information (Huang and Cai, 2013; Sun et al., 2012) ( $I$ ):

$$D = I(f, c) \quad (1)$$

And, the redundancy between feature  $f$  and the selected features is

$$R = \frac{1}{m} \sum_{f_i \in \Omega_s} I(f, f_i) \quad (2)$$

The mRMR function is to obtain the feature  $f_j$  from  $\Omega_t$  with maximum relevance with exon class  $c$  and minimum redundancy with the already-selected features and it is as following:

$$\max_{f_j \in \Omega_t} \left[ I(f_j, c) - \frac{1}{m} \sum_{f_i \in \Omega_s} I(f_j, f_i) \right] (j = 1, 2, \dots, n) \quad (3)$$

With N round of mRMR evaluation, all features can be ranked:

$$S = \{f'_1, f'_2, \dots, f'_h, \dots, f'_N\} \quad (4)$$

The top feature with a smaller index  $h$  is more important for discriminating different exons.

### IFS (Incremental Feature Selection)

The ranked feature list needs to be further analyzed to determine the cutoff of how many top features should be selected. To do so, we applied IFS (Incremental Feature Selection) (Li et al., 2014; Shu et al., 2014; Yang et al., 2014; Zhang et al., 2015a). During IFS, we tested all candidate feature set  $S_i = \{f_1, f_2, \dots, f_i\}$  ( $1 \leq i \leq N$ ) which included the top  $i$  features. And the feature set with highest 10-fold cross validation (Chen et al., 2014; Cui et al., 2013; Yang et al., 2014) Matthews's correlation coefficient (MCC) (Chen et al., 2015; Zhang et al., 2015a) was selected.

To construct a classifier to evaluate the classification performance of a feature set, we used a support vector machine (SVM) based method, SMO (sequential minimal optimization) (Zhang et al., 2015b) in Weka (Frank et al., 2004). The default parameters of SMO in Weka were adopted. The complexity constant was set to be 1, the tolerance parameter was set to be 1.0e-3, the epsilon for round-off error was set to be 1.0e-12, the exponent to use was set to be 1.0 and the kernel to use was poly kernel.

### References

- Barash, Y., Calarco, J.A., Gao, W., Pan, Q., Wang, X., Shai, O., Blencowe, B.J., and Frey, B.J. (2010). Deciphering the splicing code. *Nature* 465, 53-59.
- Chen, L., Chu, C., Huang, T., Kong, X., and Cai, Y.D. (2015). Prediction and analysis of cell-penetrating peptides using pseudo-amino acid composition and random forest models. *Amino Acids*.
- Chen, L., Lu, J., Zhang, N., Huang, T., and Cai, Y.D. (2014). A hybrid method for prediction and repositioning of drug Anatomical Therapeutic Chemical classes. *Mol Biosyst* 10, 868-877.
- Cui, W., Chen, L., Huang, T., Gao, Q., Jiang, M., Zhang, N., Zheng, L., Feng, K., Cai, Y., and Wang, H. (2013). Computationally identifying virulence factors based on KEGG pathways. *Mol Biosyst* 9, 1447-1452.
- Fagnani, M., Barash, Y., Ip, J.Y., Misquitta, C., Pan, Q., Saltzman, A.L., Shai, O., Lee, L., Rozenhek, A., Mohammad, N., *et al.* (2007). Functional coordination of alternative splicing in the mammalian central nervous system. *Genome Biol* 8, R108.
- Frank, E., Hall, M., Trigg, L., Holmes, G., and Witten, I.H. (2004). Data mining in bioinformatics using Weka. *Bioinformatics* 20, 2479-2481.
- Huang, T., and Cai, Y.-D. (2013). An Information-Theoretic Machine Learning Approach to Expression QTL Analysis. *PLoS ONE* 8, e67899.
- Leung, M.K., Xiong, H.Y., Lee, L.J., and Frey, B.J. (2014). Deep learning of the tissue-regulated splicing code. *Bioinformatics* 30, i121-129.
- Li, B.Q., You, J., Huang, T., and Cai, Y.D. (2014). Classification of non-small cell lung cancer based on copy number alterations. *PLoS ONE* 9, e88300.
- Niu, B., Huang, G., Zheng, L., Wang, X., Chen, F., Zhang, Y., and Huang, T. (2013). Prediction of substrate-enzyme-product interaction based on molecular descriptors and physicochemical properties. *Biomed Res Int* 2013, 674215.

- Peng, H., Long, F., and Ding, C. (2005). Feature selection based on mutual information: criteria of max-dependency, max-relevance, and min-redundancy. *IEEE Trans Pattern Anal Mach Intell* 27, 1226-1238.
- Shu, Y., Zhang, N., Kong, X., Huang, T., and Cai, Y.D. (2014). Predicting A-to-I RNA Editing by Feature Selection and Random Forest. *PLoS ONE* 9, e110607.
- Sun, L., Yu, Y., Huang, T., An, P., Yu, D., Yu, Z., Li, H., Sheng, H., Cai, L., Xue, J., *et al.* (2012). Associations between ionic profile and metabolic abnormalities in human population. *PLoS ONE* 7, e38845.
- Xiong, H.Y., Barash, Y., and Frey, B.J. (2011). Bayesian prediction of tissue-regulated splicing using RNA sequence and cellular context. *Bioinformatics* 27, 2554-2562.
- Yang, J., Chen, L., Kong, X., Huang, T., and Cai, Y.D. (2014). Analysis of Tumor Suppressor Genes Based on Gene Ontology and the KEGG Pathway. *PLoS ONE* 9, e107202.
- Zhang, N., Huang, T., and Cai, Y.D. (2015a). Discriminating between deleterious and neutral non-frameshifting indels based on protein interaction networks and hybrid properties. *Mol Genet Genomics* 290, 343-352.
- Zhang, P.W., Chen, L., Huang, T., Zhang, N., Kong, X.Y., and Cai, Y.D. (2015b). Classifying ten types of major cancers based on reverse phase protein array profiles. *PLoS One* 10, e0123147.
- Zhao, T.H., Jiang, M., Huang, T., Li, B.Q., Zhang, N., Li, H.P., and Cai, Y.D. (2013). A novel method of predicting protein disordered regions based on sequence features. *Biomed Res Int* 2013, 414327.
- Zhou, Y., Zhang, N., Li, B.Q., Huang, T., Cai, Y.D., and Kong, X.Y. (2015). A method to distinguish between lysine acetylation and lysine ubiquitination with feature selection and analysis. *J Biomol Struct Dyn*, 1-12.

Supplementary Figures

## Alternative spliced exons

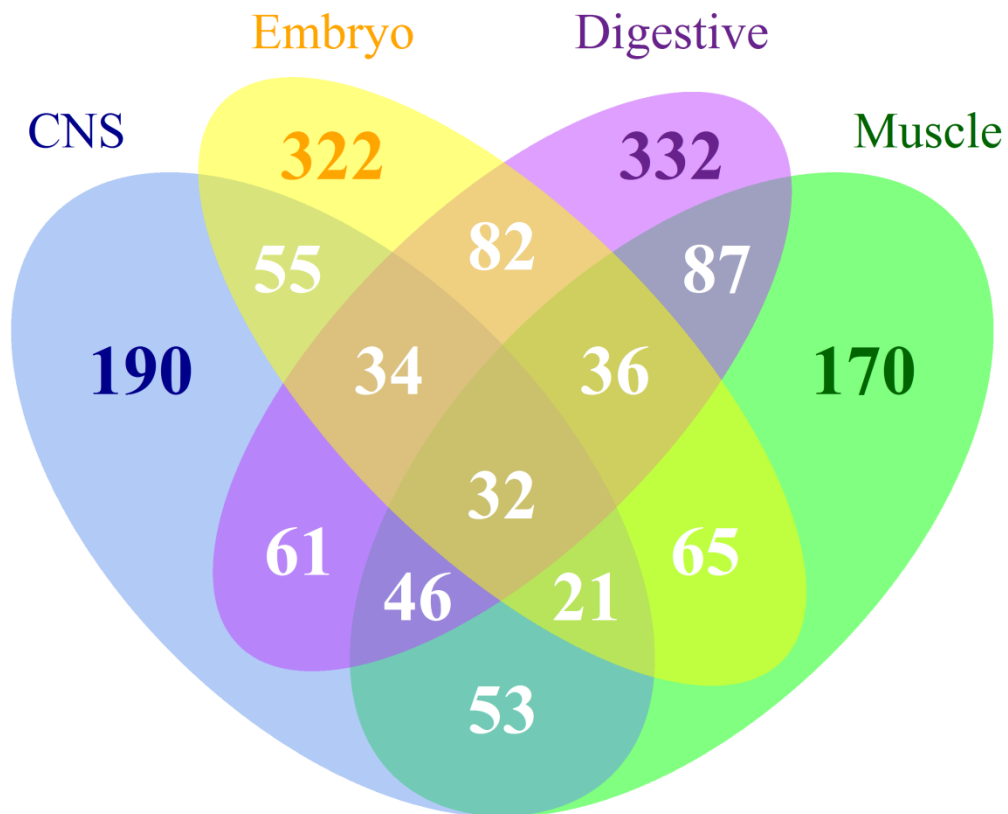

**Figure S1** - Venn diagram for shared AS exons among four tissues

The numbers of tissue specific AS exons and shared AS exons were shown.

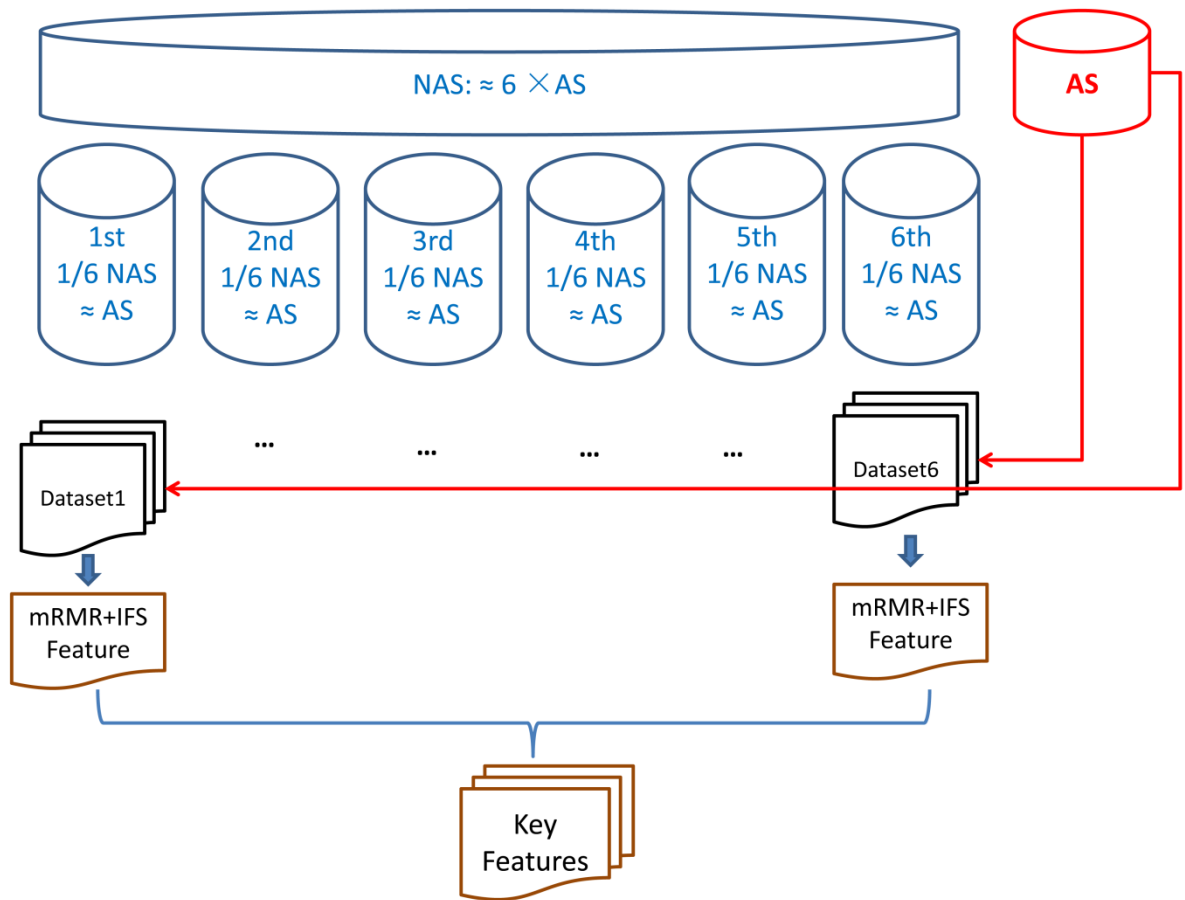

**Figure S2** - The workflow of identifying key features for discriminating non-alternative spliced cassette exons and alternative spliced cassette exons

First, since there are more non-alternative spliced (NAS) cassette exons than alternative spliced (AS) cassette exons, we equally divided the non-alternative spliced cassette exons into six parts and each part has similar number of non-alternative spliced cassette exons as the alternative spliced cassette exons. By combining the same alternative spliced cassette exons with different non-alternative spliced cassette exon parts, we compiled six datasets. Then, on each balanced dataset, we utilized mRMR+IFS approach to identify the important features for predicting alternative spliced cassette exons. The mRMR+IFS approach will be described in the following sections. Finally, the identified features on each datasets were combined.

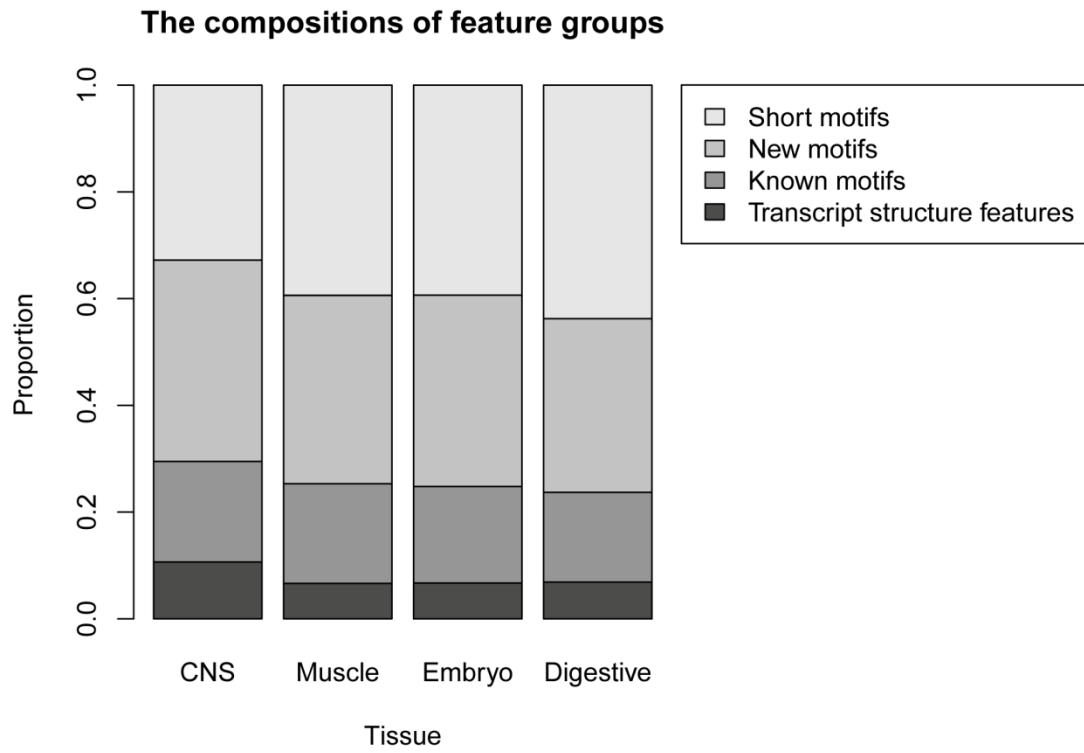

**Figure S3** - The compositions of different feature groups in each tissue

# Key features

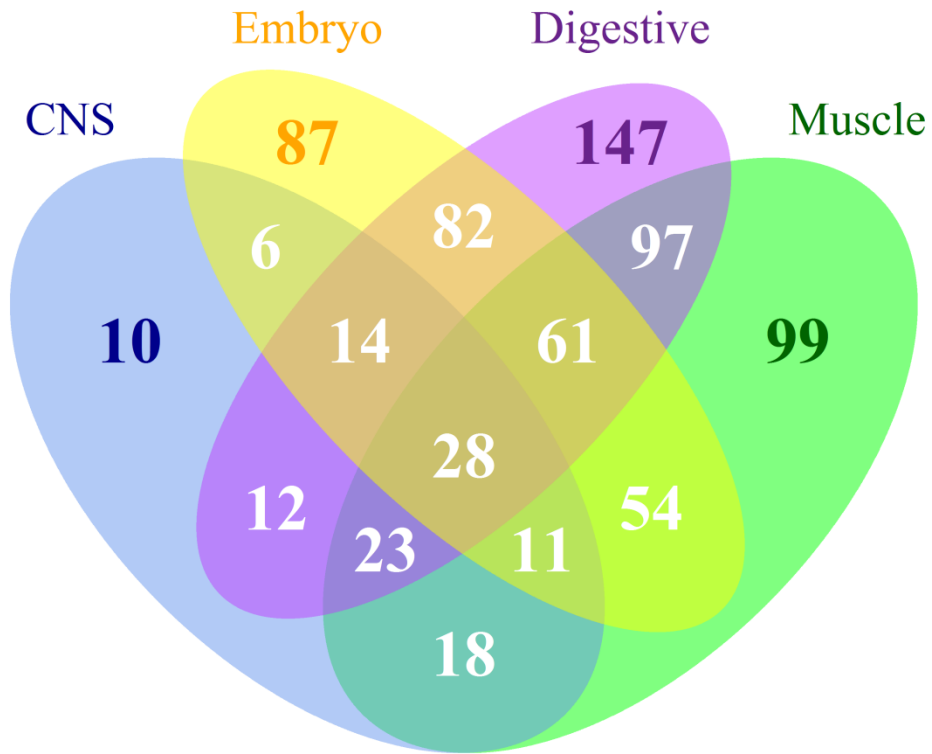

**Figure S4** - Venn diagram for features identified across 4 tissue types  
Both overlapped and tissue- specific features are shown.



## Supplementary Tables

**Table S1** - The number of non-alternative spliced and alternative spliced cassette exons

| Tissue    | Number of non-alternative spliced cassette exons | Number of alternative spliced cassette exons |
|-----------|--------------------------------------------------|----------------------------------------------|
| CNS       | 3173                                             | 492                                          |
| Muscle    | 3155                                             | 510                                          |
| Embryo    | 3018                                             | 647                                          |
| Digestive | 2955                                             | 710                                          |

**Table S2** - The 1,014 features of cassette exon and their annotations

| Feature Name         | Label        | Region | Type         |
|----------------------|--------------|--------|--------------|
| cis.ShortSeq.AC.C2I2 | NucFreq.C2I2 | I2(3') | short motifs |
| cis.Fox.v2.C2I2      | Fox          | I2(3') | known motifs |
| cis.Fox.v3.C2I2      | Fox          | I2(3') | known motifs |
| cis.Fox.v1.C2I2      | Fox          | I2(3') | known motifs |
| cis.Nova.NISS1       | Nova         | NISS1  | known motifs |
| cis.Nova.NISS2       | Nova         | NISS2  | known motifs |
| cis.Fox.v2.I2        | Fox          | I2(5') | known motifs |
| cis.Fox.v3.I2        | Fox          | I2(5') | known motifs |
| cis.GUrich.v1.I2     | GUrich       | I2(5') | known motifs |
| cis.GUrich.v2.I2     | GUrich       | I2(5') | known motifs |
| cis.GUrich.v3.I2     | GUrich       | I2(5') | known motifs |
| cis.GUrich.v4.I2     | GUrich       | I2(5') | known motifs |
| cis.Tra2.I2          | Tra2         | I2(5') | known motifs |
| cis.UGrich.v1.I2     | UGrich       | I2(5') | known motifs |
| cis.UGrich.v2.I2     | UGrich       | I2(5') | known motifs |
| cis.CUGBP.n2.I2      | Cugbp        | I2(5') | known motifs |
| cis.CUGBP.n3.I2      | Cugbp        | I2(5') | known motifs |
| cis.CELFluke.I2      | Celf         | I2(5') | known motifs |
| cis.Quak.I2          | Quaking      | I2(5') | known motifs |
| cis.MBNL.v1.I2       | Mbnl         | I2(5') | known motifs |

---

|                       |        |               |              |
|-----------------------|--------|---------------|--------------|
| cis.MBNL.v2.I2        | Mbnl   | I2(5')        | known motifs |
| cis.MBNL.v3.I2        | Mbnl   | I2(5')        | known motifs |
| cis.Nova.I2           | Nova   | I2(5')        | known motifs |
| cis.Grich.I2          | Grich  | I2(5')        | known motifs |
| cis.Trich.WithC.I2    | Urich  | I2(5')        | known motifs |
| cis.Trich.WithG.I2    | Urich  | I2(5')        | known motifs |
| cis.Trich.I2          | Urich  | I2(5')        | known motifs |
| cis.Fox.v1.I2         | Fox    | I2(5')        | known motifs |
| cis.PTB.v1.I2         | (n)PTB | I2(5')        | known motifs |
| cis.PTB.v2.I2         | (n)PTB | I2(5')        | known motifs |
| cis.PTB.v3.I2         | (n)PTB | I2(5')        | known motifs |
| cis.PTB.v4.I2         | (n)PTB | I2(5')        | known motifs |
| cis.Fox.v2.I1         | Fox    | I1(3')        | known motifs |
| cis.Fox.v3.I1         | Fox    | I1(3')        | known motifs |
| cis.GUrich.v1.I1      | GUrich | I1(3')        | known motifs |
| cis.GUrich.v2.I1      | GUrich | I1(3')        | known motifs |
| cis.GUrich.v3.I1      | GUrich | I1(3')        | known motifs |
| cis.GUrich.v4.I1      | GUrich | I1(3')        | known motifs |
| cis.Tra2.I1           | Tra2   | I1(3')        | known motifs |
| cis.UGrich.v1.I1      | UGrich | I1(3')        | known motifs |
| cis.UGrich.v2.I1      | UGrich | I1(3')        | known motifs |
| cis.CUGBP.n2.I1       | Cugbp  | I1(3')        | known motifs |
| cis.CUGBP.n3.I1       | Cugbp  | I1(3')        | known motifs |
| cis.MBNL.v1.I1        | Mbnl   | I1(3')        | known motifs |
| cis.MBNL.v2.I1        | Mbnl   | I1(3')        | known motifs |
| cis.MBNL.v3.I1        | Mbnl   | I1(3')        | known motifs |
| cis.Nova.I1           | Nova   | I1(3')        | known motifs |
| cis.Sugnet.I1         | Sugnet | I1(3')        | known motifs |
| cis.Fox.v1.I1         | Fox    | I1(3')        | known motifs |
| cis.PTB.v1.I1         | (n)PTB | I1(3')        | known motifs |
| cis.PTB.v2.I1         | (n)PTB | I1(3')        | known motifs |
| cis.PTB.v3.I1         | (n)PTB | I1(3')        | known motifs |
| cis.PTB.v4.I1         | (n)PTB | I1(3')        | known motifs |
| cisCons.Nova.AI2_C2I2 | Nova   | I2(5'),I2(3') | known motifs |

---

---

|                          |         |               |              |
|--------------------------|---------|---------------|--------------|
| cisCons.Nova.C1I1_AI1    | Nova    | I1(3'),I1(5') | known motifs |
| cisCons.Nova.NISE3       | Nova    | NISE3         | known motifs |
| cisCons.CUGBP.n2.I1I2    | Cugbp   | I1(3'),I2(5') | known motifs |
| cisCons.CUGBP.n3.I1I2    | Cugbp   | I1(3'),I2(5') | known motifs |
| cisCons.Nova.I1I2        | Nova    | I1(3'),I2(5') | known motifs |
| cisCons.Fox.v1.I1I2      | Fox     | I1(3'),I2(5') | known motifs |
| cisCons.PTB.v1.I1I2      | (n)PTB  | I1(3'),I2(5') | known motifs |
| cisCons.PTB.v2.I1I2      | (n)PTB  | I1(3'),I2(5') | known motifs |
| cisCons.PTB.v3.I1I2      | (n)PTB  | I1(3'),I2(5') | known motifs |
| cisCons.PTB.v4.I1I2      | (n)PTB  | I1(3'),I2(5') | known motifs |
| cisCons.Nova.NESE1_NESS2 | Nova    | NESE1_NESS2   | known motifs |
| cisCons.Fox.v2.C1I1      | Fox     | I1(5')        | known motifs |
| cisCons.Fox.v3.C1I1      | Fox     | I1(5')        | known motifs |
| cisCons.Fox.v1.C1I1      | Fox     | I1(5')        | known motifs |
| cisCons.Nova.NISE2       | Nova    | NISE2         | known motifs |
| cisCons.Nova.NISE1       | Nova    | NISE1         | known motifs |
| cisCons.Nova.NISS1       | Nova    | NISS1         | known motifs |
| cisCons.Fox.v2.C2I2      | Fox     | I2(3')        | known motifs |
| cisCons.Fox.v3.C2I2      | Fox     | I2(3')        | known motifs |
| cisCons.Fox.v1.C2I2      | Fox     | I2(3')        | known motifs |
| cisCons.Nova.NISS2       | Nova    | NISS2         | known motifs |
| cisCons.Fox.v2.I2        | Fox     | I2(5')        | known motifs |
| cisCons.Fox.v3.I2        | Fox     | I2(5')        | known motifs |
| cisCons.GUrich.v1.I2     | GUrich  | I2(5')        | known motifs |
| cisCons.GUrich.v2.I2     | GUrich  | I2(5')        | known motifs |
| cisCons.GUrich.v3.I2     | GUrich  | I2(5')        | known motifs |
| cisCons.GUrich.v4.I2     | GUrich  | I2(5')        | known motifs |
| cisCons.Tra2.I2          | Tra2    | I2(5')        | known motifs |
| cisCons.UGrich.v1.I2     | UGrich  | I2(5')        | known motifs |
| cisCons.UGrich.v2.I2     | UGrich  | I2(5')        | known motifs |
| cisCons.CUGBP.n2.I2      | Cugbp   | I2(5')        | known motifs |
| cisCons.CUGBP.n3.I2      | Cugbp   | I2(5')        | known motifs |
| cisCons.CELFlIke.I2      | Celf    | I2(5')        | known motifs |
| cisCons.Quak.I2          | Quaking | I2(5')        | known motifs |

---

---

|                        |        |        |              |
|------------------------|--------|--------|--------------|
| cisCons.MBNL.v1.I2     | Mbnl   | I2(5') | known motifs |
| cisCons.MBNL.v2.I2     | Mbnl   | I2(5') | known motifs |
| cisCons.MBNL.v3.I2     | Mbnl   | I2(5') | known motifs |
| cisCons.Nova.I2        | Nova   | I2(5') | known motifs |
| cisCons.Grich.I2       | Grich  | I2(5') | known motifs |
| cisCons.Trich.WithC.I2 | Urich  | I2(5') | known motifs |
| cisCons.Trich.WithG.I2 | Urich  | I2(5') | known motifs |
| cisCons.Trich.I2       | Urich  | I2(5') | known motifs |
| cisCons.Fox.v1.I2      | Fox    | I2(5') | known motifs |
| cisCons.PTB.v1.I2      | (n)PTB | I2(5') | known motifs |
| cisCons.PTB.v2.I2      | (n)PTB | I2(5') | known motifs |
| cisCons.PTB.v3.I2      | (n)PTB | I2(5') | known motifs |
| cisCons.PTB.v4.I2      | (n)PTB | I2(5') | known motifs |
| cisCons.Fox.v2.I1      | Fox    | I1(3') | known motifs |
| cisCons.Fox.v3.I1      | Fox    | I1(3') | known motifs |
| cisCons.GUrich.v1.I1   | GUrich | I1(3') | known motifs |
| cisCons.GUrich.v2.I1   | GUrich | I1(3') | known motifs |
| cisCons.GUrich.v3.I1   | GUrich | I1(3') | known motifs |
| cisCons.GUrich.v4.I1   | GUrich | I1(3') | known motifs |
| cisCons.Tra2.I1        | Tra2   | I1(3') | known motifs |
| cisCons.UGrich.v1.I1   | UGrich | I1(3') | known motifs |
| cisCons.UGrich.v2.I1   | UGrich | I1(3') | known motifs |
| cisCons.CUGBP.n2.I1    | Cugbp  | I1(3') | known motifs |
| cisCons.CUGBP.n3.I1    | Cugbp  | I1(3') | known motifs |
| cisCons.MBNL.v1.I1     | Mbnl   | I1(3') | known motifs |
| cisCons.MBNL.v2.I1     | Mbnl   | I1(3') | known motifs |
| cisCons.MBNL.v3.I1     | Mbnl   | I1(3') | known motifs |
| cisCons.Nova.I1        | Nova   | I1(3') | known motifs |
| cisCons.Sugnet.I1      | Sugnet | I1(3') | known motifs |
| cisCons.Fox.v1.I1      | Fox    | I1(3') | known motifs |
| cisCons.PTB.v1.I1      | (n)PTB | I1(3') | known motifs |
| cisCons.PTB.v2.I1      | (n)PTB | I1(3') | known motifs |
| cisCons.PTB.v3.I1      | (n)PTB | I1(3') | known motifs |
| cisCons.PTB.v4.I1      | (n)PTB | I1(3') | known motifs |

---

---

|                           |         |               |              |
|---------------------------|---------|---------------|--------------|
| cis.PSSM.SC35.C1          | SC35    | C1            | known motifs |
| cis.PSSM.SF2_ASF.C1       | SF2_ASF | C1            | known motifs |
| cis.PSSM.SRp40.C1         | SRp40   | C1            | known motifs |
| cis.PSSM.SRp55.C1         | SRp55   | C1            | known motifs |
| cis.PSSM.SC35.A           | SC35    | A             | known motifs |
| cis.PSSM.SF2_ASF.A        | SF2_ASF | A             | known motifs |
| cis.PSSM.SRp40.A          | SRp40   | A             | known motifs |
| cis.PSSM.SRp55.A          | SRp55   | A             | known motifs |
| cis.PSSM.SC35.C2          | SC35    | C2            | known motifs |
| cis.PSSM.SF2_ASF.C2       | SF2_ASF | C2            | known motifs |
| cis.PSSM.SRp40.C2         | SRp40   | C2            | known motifs |
| cis.PSSM.SRp55.C2         | SRp55   | C2            | known motifs |
| cis.PSSM.SC35.I1          | SC35    | I1(3')        | known motifs |
| cis.PSSM.SF2_ASF.I1       | SF2_ASF | I1(3')        | known motifs |
| cis.PSSM.SRp40.I1         | SRp40   | I1(3')        | known motifs |
| cis.PSSM.SRp55.I1         | SRp55   | I1(3')        | known motifs |
| cis.PSSM.SC35.I2          | SC35    | I2(5')        | known motifs |
| cis.PSSM.SF2_ASF.I2       | SF2_ASF | I2(5')        | known motifs |
| cis.PSSM.SRp40.I2         | SRp40   | I2(5')        | known motifs |
| cis.PSSM.SRp55.I2         | SRp55   | I2(5')        | known motifs |
| cis.NovaClust.NESE1_NESS2 | Nova    | NESE1_NESS2   | known motifs |
| cis.NovaClust.NESS1       | Nova    | NESS1         | known motifs |
| cis.NovaClust.NISE1       | Nova    | NISE1         | known motifs |
| cis.NovaClust.NISE2       | Nova    | NISE2         | known motifs |
| cis.NovaClust.NISE3       | Nova    | NISE3         | known motifs |
| cis.NovaClust.NISS1       | Nova    | NISS1         | known motifs |
| cis.NovaClust.NISS2       | Nova    | NISS2         | known motifs |
| cis.Nova.NESS1            | Nova    | NESS1         | known motifs |
| cis.Nova.AI2_C2I2         | Nova    | I2(5'),I2(3') | known motifs |
| cis.Nova.C1I1_AI1         | Nova    | I1(3'),I1(5') | known motifs |
| cis.Nova.C1               | Nova    | C1            | known motifs |
| cis.Nova.NISE3            | Nova    | NISE3         | known motifs |
| cis.CUGBP.n2.I1I2         | Cugbp   | I1(3'),I2(5') | known motifs |
| cis.CUGBP.n3.I1I2         | Cugbp   | I1(3'),I2(5') | known motifs |

---

---

|                                    |          |               |              |
|------------------------------------|----------|---------------|--------------|
| cis.Nova.I1I2                      | Nova     | I1(3'),I2(5') | known motifs |
| cis.Fox.v1.I1I2                    | Fox      | I1(3'),I2(5') | known motifs |
| cis.PTB.v1.I1I2                    | (n)PTB   | I1(3'),I2(5') | known motifs |
| cis.PTB.v2.I1I2                    | (n)PTB   | I1(3'),I2(5') | known motifs |
| cis.PTB.v3.I1I2                    | (n)PTB   | I1(3'),I2(5') | known motifs |
| cis.PTB.v4.I1I2                    | (n)PTB   | I1(3'),I2(5') | known motifs |
| cis.Nova.NESE1_NESS2               | Nova     | NESE1_NESS2   | known motifs |
| cis.Nova.C2                        | Nova     | C2            | known motifs |
| cis.Fox.v2.C1I1                    | Fox      | I1(5')        | known motifs |
| cis.Fox.v3.C1I1                    | Fox      | I1(5')        | known motifs |
| cis.Fox.v1.C1I1                    | Fox      | I1(5')        | known motifs |
| cis.Tra2.A                         | Tra2     | A             | known motifs |
| cis.Nova.A                         | Nova     | A             | known motifs |
| cis.Nova.C1_A                      | Nova     | C1_A          | known motifs |
| cis.Nova.NISE2                     | Nova     | NISE2         | known motifs |
| cis.Nova.NISE1                     | Nova     | NISE1         | known motifs |
| cisCons.YeoClustDown.1.GTAAC.I2    | Motif.I2 | I2(5')        | new motifs   |
| cisCons.YeoClustDown.2.AAGTGT.I2   | Motif.I2 | I2(5')        | new motifs   |
| cisCons.YeoClustDown.3.GTTTGT.I2   | Motif.I2 | I2(5')        | new motifs   |
| cisCons.YeoClustDown.4.ATTAACA.I2  | Motif.I2 | I2(5')        | new motifs   |
| cisCons.YeoClustDown.5.TGAAG.I2    | Motif.I2 | I2(5')        | new motifs   |
| cisCons.YeoClustDown.6.TAACC.I2    | Motif.I2 | I2(5')        | new motifs   |
| cisCons.YeoClustDown.7.TTGAAAT.I2  | Motif.I2 | I2(5')        | new motifs   |
| cisCons.YeoClustDown.8.AATTG.I2    | Motif.I2 | I2(5')        | new motifs   |
| cisCons.YeoClustDown.9.CTGCT.I2    | Motif.I2 | I2(5')        | new motifs   |
| cisCons.YeoClustDown.10.TTTATG.I2  | Motif.I2 | I2(5')        | new motifs   |
| cisCons.YeoClustDown.11.TGATAAA.I2 | Motif.I2 | I2(5')        | new motifs   |
| cisCons.YeoClustDown.12.ATGTTT.I2  | Motif.I2 | I2(5')        | new motifs   |
| cisCons.YeoClustDown.13.TTTCAA.I2  | Motif.I2 | I2(5')        | new motifs   |
| cisCons.YeoClustDown.14.AAGTC.I2   | Motif.I2 | I2(5')        | new motifs   |
| cisCons.YeoClustDown.15.AAAGA.I2   | Motif.I2 | I2(5')        | new motifs   |
| cisCons.YeoClustDown.16.GTACGT.I2  | Motif.I2 | I2(5')        | new motifs   |
| cisCons.YeoClustDown.17.GTTAAA.I2  | Motif.I2 | I2(5')        | new motifs   |
| cisCons.YeoClustDown.18.GAGCTG.I2  | Motif.I2 | I2(5')        | new motifs   |

---

---

|                                    |          |        |            |
|------------------------------------|----------|--------|------------|
| cisCons.YeoClustDown.19.TCATTTT.I2 | Motif.I2 | I2(5') | new motifs |
| cisCons.YeoClustDown.20.TGCATG.I2  | Fox      | I2(5') | new motifs |
| cisCons.YeoClustDown.21.TTCTT.I2   | (n)PTB   | I2(5') | new motifs |
| cisCons.YeoClustDown.22.TTTATC.I2  | Motif.I2 | I2(5') | new motifs |
| cisCons.YeoClustDown.23.ACATTT.I2  | Motif.I2 | I2(5') | new motifs |
| cisCons.YeoClustDown.24.TGCCAGC.I2 | Motif.I2 | I2(5') | new motifs |
| cisCons.YeoClustDown.25.ATAATT.I2  | Motif.I2 | I2(5') | new motifs |
| cisCons.YeoClustDown.26.GTAGG.I2   | Motif.I2 | I2(5') | new motifs |
| cisCons.YeoClustDown.27.GTATCCT.I2 | Motif.I2 | I2(5') | new motifs |
| cisCons.YeoClustDown.28.CATTTG.I2  | Motif.I2 | I2(5') | new motifs |
| cisCons.YeoClustDown.29.ACTAAC.I2  | Quaking  | I2(5') | new motifs |
| cisCons.YeoClustDown.30.TTTCAG.I2  | Motif.I2 | I2(5') | new motifs |
| cisCons.YeoClustDown.31.AATTGA.I2  | Motif.I2 | I2(5') | new motifs |
| cisCons.YeoClustDown.32.TTAGCA.I2  | Motif.I2 | I2(5') | new motifs |
| cisCons.YeoClustDown.33.CAAAT.I2   | Motif.I2 | I2(5') | new motifs |
| cisCons.YeoClustDown.34.TAATG.I2   | Motif.I2 | I2(5') | new motifs |
| cisCons.YeoClustDown.35.TTTTGAT.I2 | Motif.I2 | I2(5') | new motifs |
| cisCons.YeoClustDown.36.AGAAAT.I2  | Motif.I2 | I2(5') | new motifs |
| cisCons.YeoClustDown.37.TTTCTA.I2  | (n)PTB   | I2(5') | new motifs |
| cisCons.YeoClustDown.38.TATTTTC.I2 | Motif.I2 | I2(5') | new motifs |
| cisCons.YeoClustDown.39.TAACT.I2   | Motif.I2 | I2(5') | new motifs |
| cisCons.YeoClustDown.40.TGAGG.I2   | Motif.I2 | I2(5') | new motifs |
| cisCons.YeoClustDown.41.TAAAAT.I2  | Motif.I2 | I2(5') | new motifs |
| cisCons.YeoClustDown.42.TTTATA.I2  | Motif.I2 | I2(5') | new motifs |
| cisCons.YeoClustDown.43.TATCCT.I2  | Motif.I2 | I2(5') | new motifs |
| cisCons.YeoClustDown.44.GTTAGT.I2  | Motif.I2 | I2(5') | new motifs |
| cisCons.YeoClustDown.45.TTTACAG.I2 | Motif.I2 | I2(5') | new motifs |
| cisCons.YeoClustDown.46.TATTTG.I2  | Motif.I2 | I2(5') | new motifs |
| cisCons.YeoClustDown.47.GTACTGT.I2 | Motif.I2 | I2(5') | new motifs |
| cisCons.YeoClustDown.48.TTAAG.I2   | Motif.I2 | I2(5') | new motifs |
| cisCons.YeoClustDown.49.CATAAA.I2  | Motif.I2 | I2(5') | new motifs |
| cisCons.YeoClustDown.50.GCATG.I2   | Fox      | I2(5') | new motifs |
| cisCons.YeoClustDown.51.TGATTA.I2  | Motif.I2 | I2(5') | new motifs |
| cisCons.YeoClustDown.52.TTTTAAA.I2 | Motif.I2 | I2(5') | new motifs |

---

---

|                                    |          |        |            |
|------------------------------------|----------|--------|------------|
| cisCons.YeoClustDown.53.CTGACT.I2  | Motif.I2 | I2(5') | new motifs |
| cisCons.YeoClustDown.54.ACTAAT.I2  | Motif.I2 | I2(5') | new motifs |
| cisCons.YeoClustDown.55.GAGTA.I2   | Motif.I2 | I2(5') | new motifs |
| cisCons.YeoClustDown.56.TCTTAA.I2  | (n)PTB   | I2(5') | new motifs |
| cisCons.YeoClustDown.57.TTGGTT.I2  | Motif.I2 | I2(5') | new motifs |
| cisCons.YeoClustDown.58.ATATTT.I2  | Motif.I2 | I2(5') | new motifs |
| cisCons.YeoClustDown.59.AGAGCCA.I2 | Motif.I2 | I2(5') | new motifs |
| cisCons.YeoClustDown.60.TCTTT.I2   | (n)PTB   | I2(5') | new motifs |
| cisCons.YeoClustDown.61.AGTTTT.I2  | Motif.I2 | I2(5') | new motifs |
| cisCons.YeoClustDown.62.GTATTT.I2  | Motif.I2 | I2(5') | new motifs |
| cisCons.YeoClustDown.63.TCAGA.I2   | Motif.I2 | I2(5') | new motifs |
| cisCons.YeoClustDown.64.TAAGT.I2   | Motif.I2 | I2(5') | new motifs |
| cisCons.YeoClustDown.65.AAGCA.I2   | Motif.I2 | I2(5') | new motifs |
| cisCons.YeoClustDown.66.TTCACAG.I2 | Motif.I2 | I2(5') | new motifs |
| cisCons.YeoClustDown.67.AGTAA.I2   | Motif.I2 | I2(5') | new motifs |
| cisCons.YeoClustDown.68.TCTGG.I2   | (n)PTB   | I2(5') | new motifs |
| cisCons.YeoClustDown.69.AGCTTT.I2  | Motif.I2 | I2(5') | new motifs |
| cisCons.YeoClustDown.70.TGATTTG.I2 | Motif.I2 | I2(5') | new motifs |
| cisCons.YeoClustDown.71.TTTTGC.I2  | Motif.I2 | I2(5') | new motifs |
| cisCons.YeoClustDown.72.TAGAAA.I2  | Motif.I2 | I2(5') | new motifs |
| cisCons.YeoClustDown.73.GTGAG.I2   | Motif.I2 | I2(5') | new motifs |
| cisCons.YeoClustDown.74.TTCTGT.I2  | (n)PTB   | I2(5') | new motifs |
| cisCons.YeoClustDown.75.GTAAG.I2   | Motif.I2 | I2(5') | new motifs |
| cisCons.YeoClustDown.76.ATGAAA.I2  | Motif.I2 | I2(5') | new motifs |
| cisCons.YeoClustDown.77.AGAAAA.I2  | Motif.I2 | I2(5') | new motifs |
| cisCons.YeoClustDown.78.TGAGC.I2   | Motif.I2 | I2(5') | new motifs |
| cisCons.YeoClustDown.79.TGGCTT.I2  | Motif.I2 | I2(5') | new motifs |
| cisCons.YeoClustDown.80.TTAATCT.I2 | (n)PTB   | I2(5') | new motifs |
| cisCons.YeoClustDown.81.AATTAT.I2  | Motif.I2 | I2(5') | new motifs |
| cisCons.YeoClustDown.82.TGGAAAT.I2 | Motif.I2 | I2(5') | new motifs |
| cisCons.YeoClustDown.83.CCACAG.I2  | Motif.I2 | I2(5') | new motifs |
| cisCons.YeoClustDown.84.AAATGA.I2  | Motif.I2 | I2(5') | new motifs |
| cisCons.YeoClustDown.85.GCAAGT.I2  | Motif.I2 | I2(5') | new motifs |
| cisCons.YeoClustDown.86.GTAAAA.I2  | Motif.I2 | I2(5') | new motifs |

---



---

|                                     |          |        |            |
|-------------------------------------|----------|--------|------------|
| cisCons.YeoClustDown.87.GTCTG.I2    | (n)PTB   | I2(5') | new motifs |
| cisCons.YeoClustDown.88.AAATGT.I2   | Motif.I2 | I2(5') | new motifs |
| cisCons.YeoClustDown.89.TGCAT.I2    | Fox      | I2(5') | new motifs |
| cisCons.YeoClustDown.90.GAGAAA.I2   | Motif.I2 | I2(5') | new motifs |
| cisCons.YeoClustDown.91.TTAGA.I2    | Motif.I2 | I2(5') | new motifs |
| cisCons.YeoClustDown.92.TTTATAA.I2  | Motif.I2 | I2(5') | new motifs |
| cisCons.YeoClustDown.93.GTTTT.I2    | Motif.I2 | I2(5') | new motifs |
| cisCons.YeoClustDown.94.GCTTGGC.I2  | Motif.I2 | I2(5') | new motifs |
| cisCons.YeoClustDown.95.TAAGC.I2    | Motif.I2 | I2(5') | new motifs |
| cisCons.YeoClustDown.96.GTATG.I2    | Motif.I2 | I2(5') | new motifs |
| cisCons.YeoClustDown.97.AAATT.I2    | Motif.I2 | I2(5') | new motifs |
| cisCons.YeoClustDown.98.GTAAT.I2    | Motif.I2 | I2(5') | new motifs |
| cisCons.YeoClustDown.99.TTCTCT.I2   | (n)PTB   | I2(5') | new motifs |
| cisCons.YeoClustDown.100.TGAGAA.I2  | Motif.I2 | I2(5') | new motifs |
| cisCons.YeoClustDown.101.TTAGTT.I2  | Motif.I2 | I2(5') | new motifs |
| cisCons.YeoClustDown.102.TAAGG.I2   | Motif.I2 | I2(5') | new motifs |
| cisCons.YeoClustDown.103.TGTTTAA.I2 | Motif.I2 | I2(5') | new motifs |
| cisCons.YeoClustDown.104.GTCAGT.I2  | Motif.I2 | I2(5') | new motifs |
| cisCons.YeoClustDown.105.AGAATT.I2  | Motif.I2 | I2(5') | new motifs |
| cisCons.YeoClustDown.106.TAAATG.I2  | Motif.I2 | I2(5') | new motifs |
| cisCons.YeoClustDown.107.AATTCA.I2  | Motif.I2 | I2(5') | new motifs |
| cisCons.YeoClustDown.108.TCCTTT.I2  | Motif.I2 | I2(5') | new motifs |
| cisCons.YeoClustDown.109.TAAGA.I2   | Motif.I2 | I2(5') | new motifs |
| cisCons.YeoClustDown.110.AAATCA.I2  | Motif.I2 | I2(5') | new motifs |
| cisCons.YeoClustDown.111.TAATTTG.I2 | Motif.I2 | I2(5') | new motifs |
| cisCons.YeoClustDown.112.GAAATA.I2  | Motif.I2 | I2(5') | new motifs |
| cisCons.YeoClustDown.113.TGGTTT.I2  | Motif.I2 | I2(5') | new motifs |
| cisCons.YeoClustDown.114.TGTTAA.I2  | Motif.I2 | I2(5') | new motifs |
| cisCons.YeoClustDown.115.TGTCT.I2   | (n)PTB   | I2(5') | new motifs |
| cisCons.YeoClustDown.116.GTTGGT.I2  | Motif.I2 | I2(5') | new motifs |
| cisCons.YeoClustDown.117.TGAATT.I2  | Motif.I2 | I2(5') | new motifs |
| cisCons.YeoClustDown.118.AATTTA.I2  | Motif.I2 | I2(5') | new motifs |
| cisCons.YeoClustDown.119.TATGT.I2   | Motif.I2 | I2(5') | new motifs |
| cisCons.YeoClustDown.120.GCATTT.I2  | Motif.I2 | I2(5') | new motifs |

---

---

|                                     |          |        |            |
|-------------------------------------|----------|--------|------------|
| cisCons.YeoClustDown.121.AAGTA.I2   | Motif.I2 | I2(5') | new motifs |
| cisCons.YeoClustDown.122.GCTTCT.I2  | (n)PTB   | I2(5') | new motifs |
| cisCons.YeoClustDown.123.TTCTAA.I2  | (n)PTB   | I2(5') | new motifs |
| cisCons.YeoClustDown.124.GTTTCT.I2  | (n)PTB   | I2(5') | new motifs |
| cisCons.YeoClustDown.125.AGATTT.I2  | Motif.I2 | I2(5') | new motifs |
| cisCons.YeoClustDown.126.GAAAAT.I2  | Motif.I2 | I2(5') | new motifs |
| cisCons.YeoClustDown.127.TGCTAA.I2  | Motif.I2 | I2(5') | new motifs |
| cisCons.YeoClustDown.128.AAGCT.I2   | Motif.I2 | I2(5') | new motifs |
| cisCons.YeoClustDown.129.CTTTGCT.I2 | Motif.I2 | I2(5') | new motifs |
| cisCons.YeoClustDown.130.TCTGA.I2   | (n)PTB   | I2(5') | new motifs |
| cisCons.YeoClustDown.131.TTTCTC.I2  | (n)PTB   | I2(5') | new motifs |
| cisCons.YeoClustDown.132.TTTATTC.I2 | Motif.I2 | I2(5') | new motifs |
| cisCons.YeoClustDown.133.TTTGCC.I2  | Motif.I2 | I2(5') | new motifs |
| cisCons.YeoClustDown.134.TGAAAG.I2  | Motif.I2 | I2(5') | new motifs |
| cisCons.YeoClustDown.135.TGTTCT.I2  | (n)PTB   | I2(5') | new motifs |
| cisCons.YeoClustDown.136.CTTTT.I2   | Motif.I2 | I2(5') | new motifs |
| cisCons.YeoClustDown.137.TTTTCTG.I2 | (n)PTB   | I2(5') | new motifs |
| cisCons.YeoClustDown.138.TGAGT.I2   | Motif.I2 | I2(5') | new motifs |
| cisCons.YeoClustDown.139.TTGCAG.I2  | Motif.I2 | I2(5') | new motifs |
| cisCons.YeoClustDown.140.TAATA.I2   | Motif.I2 | I2(5') | new motifs |
| cisCons.YeoClustDown.141.AGTAT.I2   | Motif.I2 | I2(5') | new motifs |
| cisCons.YeoClustDown.142.ATTCT.I2   | (n)PTB   | I2(5') | new motifs |
| cisCons.YeoClustDown.143.TGCCTTT.I2 | Motif.I2 | I2(5') | new motifs |
| cisCons.YeoClustDown.144.ATCAAA.I2  | Motif.I2 | I2(5') | new motifs |
| cisCons.YeoClustDown.145.GAGTG.I2   | Motif.I2 | I2(5') | new motifs |
| cisCons.YeoClustDown.146.TAGGT.I2   | Motif.I2 | I2(5') | new motifs |
| cisCons.YeoClustDown.147.CTTTA.I2   | Motif.I2 | I2(5') | new motifs |
| cisCons.YeoClustDown.148.TTTAG.I2   | Motif.I2 | I2(5') | new motifs |
| cisCons.YeoClustDown.149.TGATTTT.I2 | Motif.I2 | I2(5') | new motifs |
| cisCons.YeoClustDown.150.TTTCAT.I2  | Motif.I2 | I2(5') | new motifs |
| cisCons.YeoClustDown.151.CTTTCA.I2  | Motif.I2 | I2(5') | new motifs |
| cisCons.YeoClustDown.152.AAGAT.I2   | Motif.I2 | I2(5') | new motifs |
| cisCons.YeoClustDown.153.TGCTT.I2   | Motif.I2 | I2(5') | new motifs |
| cisCons.YeoClustDown.154.GTGGGT.I2  | Motif.I2 | I2(5') | new motifs |

---

---

|                                    |          |        |            |
|------------------------------------|----------|--------|------------|
| cisCons.YeoClustDown.155.GTAAAG.I2 | Motif.I2 | I2(5') | new motifs |
| cisCons.YeoClustDown.156.CTGAA.I2  | Motif.I2 | I2(5') | new motifs |
| cisCons.YeoClustDown.157.TCTGC.I2  | (n)PTB   | I2(5') | new motifs |
| cisCons.YeoClustDown.158.CTAAA.I2  | Motif.I2 | I2(5') | new motifs |
| cisCons.YeoClustUp.1.GTTTGT.I1     | Motif.I1 | I1(3') | new motifs |
| cisCons.YeoClustUp.2.TCTCC.I1      | (n)PTB   | I1(3') | new motifs |
| cisCons.YeoClustUp.3.GATTTT.I1     | Motif.I1 | I1(3') | new motifs |
| cisCons.YeoClustUp.4.TTTTTC.I1     | Motif.I1 | I1(3') | new motifs |
| cisCons.YeoClustUp.5.TAACC.I1      | Motif.I1 | I1(3') | new motifs |
| cisCons.YeoClustUp.6.TTGAAAT.I1    | Motif.I1 | I1(3') | new motifs |
| cisCons.YeoClustUp.7.AAGCCA.I1     | Motif.I1 | I1(3') | new motifs |
| cisCons.YeoClustUp.8.AATTG.I1      | Motif.I1 | I1(3') | new motifs |
| cisCons.YeoClustUp.9.CTGCT.I1      | Motif.I1 | I1(3') | new motifs |
| cisCons.YeoClustUp.10.TTTATG.I1    | Motif.I1 | I1(3') | new motifs |
| cisCons.YeoClustUp.11.TTCACA.I1    | Motif.I1 | I1(3') | new motifs |
| cisCons.YeoClustUp.12.TGATAA.I1    | Motif.I1 | I1(3') | new motifs |
| cisCons.YeoClustUp.13.ATGTTT.I1    | Motif.I1 | I1(3') | new motifs |
| cisCons.YeoClustUp.14.TCCAG.I1     | Motif.I1 | I1(3') | new motifs |
| cisCons.YeoClustUp.15.TTTCAA.I1    | Motif.I1 | I1(3') | new motifs |
| cisCons.YeoClustUp.16.TTATTTTC.I1  | Motif.I1 | I1(3') | new motifs |
| cisCons.YeoClustUp.17.TGTGTT.I1    | Motif.I1 | I1(3') | new motifs |
| cisCons.YeoClustUp.18.TCTTG.I1     | (n)PTB   | I1(3') | new motifs |
| cisCons.YeoClustUp.19.TTGTA.A1     | Motif.I1 | I1(3') | new motifs |
| cisCons.YeoClustUp.20.CTTGAC.I1    | Motif.I1 | I1(3') | new motifs |
| cisCons.YeoClustUp.21.TTAAAAC.I1   | Motif.I1 | I1(3') | new motifs |
| cisCons.YeoClustUp.22.CTAAC.I1     | Quaking  | I1(3') | new motifs |
| cisCons.YeoClustUp.23.AAAGCT.I1    | Motif.I1 | I1(3') | new motifs |
| cisCons.YeoClustUp.24.TCTTC.I1     | (n)PTB   | I1(3') | new motifs |
| cisCons.YeoClustUp.25.TGCATG.I1    | Fox      | I1(3') | new motifs |
| cisCons.YeoClustUp.26.TTCTT.I1     | (n)PTB   | I1(3') | new motifs |
| cisCons.YeoClustUp.27.ACATTT.I1    | Motif.I1 | I1(3') | new motifs |
| cisCons.YeoClustUp.28.TTTATC.I1    | Motif.I1 | I1(3') | new motifs |
| cisCons.YeoClustUp.29.ATTTTCT.I1   | (n)PTB   | I1(3') | new motifs |
| cisCons.YeoClustUp.30.GCTGACC.I1   | Motif.I1 | I1(3') | new motifs |

---

---

|                                  |          |        |            |
|----------------------------------|----------|--------|------------|
| cisCons.YeoClustUp.31.ATAATT.I1  | Motif.I1 | I1(3') | new motifs |
| cisCons.YeoClustUp.32.AACAG.I1   | Motif.I1 | I1(3') | new motifs |
| cisCons.YeoClustUp.33.CATTTG.I1  | Motif.I1 | I1(3') | new motifs |
| cisCons.YeoClustUp.34.TTTCAG.I1  | Motif.I1 | I1(3') | new motifs |
| cisCons.YeoClustUp.35.TTAGCA.I1  | Motif.I1 | I1(3') | new motifs |
| cisCons.YeoClustUp.36.TTGCCT.I1  | Motif.I1 | I1(3') | new motifs |
| cisCons.YeoClustUp.37.CAAAT.I1   | Motif.I1 | I1(3') | new motifs |
| cisCons.YeoClustUp.38.TTTAAC.I1  | Motif.I1 | I1(3') | new motifs |
| cisCons.YeoClustUp.39.TAATG.I1   | Motif.I1 | I1(3') | new motifs |
| cisCons.YeoClustUp.40.AGAAAT.I1  | Motif.I1 | I1(3') | new motifs |
| cisCons.YeoClustUp.41.TTTTGAT.I1 | Motif.I1 | I1(3') | new motifs |
| cisCons.YeoClustUp.42.TAACT.I1   | Motif.I1 | I1(3') | new motifs |
| cisCons.YeoClustUp.43.TAAAAT.I1  | Motif.I1 | I1(3') | new motifs |
| cisCons.YeoClustUp.44.AATTACA.I1 | Motif.I1 | I1(3') | new motifs |
| cisCons.YeoClustUp.45.TTCAAAA.I1 | Motif.I1 | I1(3') | new motifs |
| cisCons.YeoClustUp.46.TTTATA.I1  | Motif.I1 | I1(3') | new motifs |
| cisCons.YeoClustUp.47.CTTGTC.I1  | Motif.I1 | I1(3') | new motifs |
| cisCons.YeoClustUp.48.TTTACAG.I1 | Motif.I1 | I1(3') | new motifs |
| cisCons.YeoClustUp.49.TGGATTT.I1 | Motif.I1 | I1(3') | new motifs |
| cisCons.YeoClustUp.50.TTGCATT.I1 | Fox      | I1(3') | new motifs |
| cisCons.YeoClustUp.51.TTAAG.I1   | Motif.I1 | I1(3') | new motifs |
| cisCons.YeoClustUp.52.TTGGT.I1   | Motif.I1 | I1(3') | new motifs |
| cisCons.YeoClustUp.53.CATAAA.I1  | Motif.I1 | I1(3') | new motifs |
| cisCons.YeoClustUp.54.TGATTA.I1  | Motif.I1 | I1(3') | new motifs |
| cisCons.YeoClustUp.55.GCTTTGC.I1 | Motif.I1 | I1(3') | new motifs |
| cisCons.YeoClustUp.56.ATTAG.I1   | Motif.I1 | I1(3') | new motifs |
| cisCons.YeoClustUp.57.TTTTAAA.I1 | Motif.I1 | I1(3') | new motifs |
| cisCons.YeoClustUp.58.ACTAAT.I1  | Motif.I1 | I1(3') | new motifs |
| cisCons.YeoClustUp.59.CTGACT.I1  | Motif.I1 | I1(3') | new motifs |
| cisCons.YeoClustUp.60.ATATTT.I1  | Motif.I1 | I1(3') | new motifs |
| cisCons.YeoClustUp.61.CATTTA.I1  | Motif.I1 | I1(3') | new motifs |
| cisCons.YeoClustUp.62.AAATCT.I1  | (n)PTB   | I1(3') | new motifs |
| cisCons.YeoClustUp.63.TTTTGGC.I1 | Motif.I1 | I1(3') | new motifs |
| cisCons.YeoClustUp.64.TCTTT.I1   | (n)PTB   | I1(3') | new motifs |

---

---

|                                  |          |        |            |
|----------------------------------|----------|--------|------------|
| cisCons.YeoClustUp.65.TTATTGA.I1 | Motif.I1 | I1(3') | new motifs |
| cisCons.YeoClustUp.66.TCAGA.I1   | Motif.I1 | I1(3') | new motifs |
| cisCons.YeoClustUp.67.TAAGT.I1   | Motif.I1 | I1(3') | new motifs |
| cisCons.YeoClustUp.68.CTCTG.I1   | (n)PTB   | I1(3') | new motifs |
| cisCons.YeoClustUp.69.TCTGG.I1   | (n)PTB   | I1(3') | new motifs |
| cisCons.YeoClustUp.70.AATTC.I1   | Motif.I1 | I1(3') | new motifs |
| cisCons.YeoClustUp.71.TTTTCC.I1  | Motif.I1 | I1(3') | new motifs |
| cisCons.YeoClustUp.72.TTTTGC.I1  | Motif.I1 | I1(3') | new motifs |
| cisCons.YeoClustUp.73.GTGAG.I1   | Motif.I1 | I1(3') | new motifs |
| cisCons.YeoClustUp.74.TCCATTT.I1 | Motif.I1 | I1(3') | new motifs |
| cisCons.YeoClustUp.75.AATTTT.I1  | Motif.I1 | I1(3') | new motifs |
| cisCons.YeoClustUp.76.CTTGATT.I1 | Motif.I1 | I1(3') | new motifs |
| cisCons.YeoClustUp.77.GTAAG.I1   | Motif.I1 | I1(3') | new motifs |
| cisCons.YeoClustUp.78.ATGAAA.I1  | Motif.I1 | I1(3') | new motifs |
| cisCons.YeoClustUp.79.AGAAAA.I1  | Motif.I1 | I1(3') | new motifs |
| cisCons.YeoClustUp.80.TGGCTT.I1  | Motif.I1 | I1(3') | new motifs |
| cisCons.YeoClustUp.81.CTCAG.I1   | (n)PTB   | I1(3') | new motifs |
| cisCons.YeoClustUp.82.TGGAAAT.I1 | Motif.I1 | I1(3') | new motifs |
| cisCons.YeoClustUp.83.AATTAT.I1  | Motif.I1 | I1(3') | new motifs |
| cisCons.YeoClustUp.84.AATAAT.I1  | Motif.I1 | I1(3') | new motifs |
| cisCons.YeoClustUp.85.TCCTAG.I1  | Motif.I1 | I1(3') | new motifs |
| cisCons.YeoClustUp.86.CCACAG.I1  | Motif.I1 | I1(3') | new motifs |
| cisCons.YeoClustUp.87.TCATTTT.I1 | Motif.I1 | I1(3') | new motifs |
| cisCons.YeoClustUp.88.AAAGCA.I1  | Motif.I1 | I1(3') | new motifs |
| cisCons.YeoClustUp.89.AAATGA.I1  | Motif.I1 | I1(3') | new motifs |
| cisCons.YeoClustUp.90.TTTATAG.I1 | Motif.I1 | I1(3') | new motifs |
| cisCons.YeoClustUp.91.ATTAAAT.I1 | Motif.I1 | I1(3') | new motifs |
| cisCons.YeoClustUp.92.CCTGCAG.I1 | Motif.I1 | I1(3') | new motifs |
| cisCons.YeoClustUp.93.TTACAG.I1  | Motif.I1 | I1(3') | new motifs |
| cisCons.YeoClustUp.94.AAATGT.I1  | Motif.I1 | I1(3') | new motifs |
| cisCons.YeoClustUp.95.TGCAT.I1   | Fox      | I1(3') | new motifs |
| cisCons.YeoClustUp.96.CTTCT.I1   | (n)PTB   | I1(3') | new motifs |
| cisCons.YeoClustUp.97.TTAGAA.I1  | Motif.I1 | I1(3') | new motifs |
| cisCons.YeoClustUp.98.TGTTTC.I1  | Motif.I1 | I1(3') | new motifs |

---

---

|                                    |          |        |            |
|------------------------------------|----------|--------|------------|
| cisCons.YeoClustUp.99.TTTAC.I1     | Motif.I1 | I1(3') | new motifs |
| cisCons.YeoClustUp.100.GTTTT.I1    | Motif.I1 | I1(3') | new motifs |
| cisCons.YeoClustUp.101.CTTCCA.I1   | Motif.I1 | I1(3') | new motifs |
| cisCons.YeoClustUp.102.TTCTAG.I1   | (n)PTB   | I1(3') | new motifs |
| cisCons.YeoClustUp.103.AAATT.I1    | Motif.I1 | I1(3') | new motifs |
| cisCons.YeoClustUp.104.TTAAAC.I1   | Motif.I1 | I1(3') | new motifs |
| cisCons.YeoClustUp.105.TGAGAA.I1   | Motif.I1 | I1(3') | new motifs |
| cisCons.YeoClustUp.106.TTTGTAG.I1  | Motif.I1 | I1(3') | new motifs |
| cisCons.YeoClustUp.107.GTCAGT.I1   | Motif.I1 | I1(3') | new motifs |
| cisCons.YeoClustUp.108.TAAGA.I1    | Motif.I1 | I1(3') | new motifs |
| cisCons.YeoClustUp.109.AAATCA.I1   | Motif.I1 | I1(3') | new motifs |
| cisCons.YeoClustUp.110.TGTTGA.I1   | Motif.I1 | I1(3') | new motifs |
| cisCons.YeoClustUp.111.CTTGC.I1    | Motif.I1 | I1(3') | new motifs |
| cisCons.YeoClustUp.112.TAATTTG.I1  | Motif.I1 | I1(3') | new motifs |
| cisCons.YeoClustUp.113.CCTCT.I1    | (n)PTB   | I1(3') | new motifs |
| cisCons.YeoClustUp.114.TGGTTT.I1   | Motif.I1 | I1(3') | new motifs |
| cisCons.YeoClustUp.115.TGATTTTC.I1 | Motif.I1 | I1(3') | new motifs |
| cisCons.YeoClustUp.116.TGTTAA.I1   | Motif.I1 | I1(3') | new motifs |
| cisCons.YeoClustUp.117.TGTGTC.I1   | Motif.I1 | I1(3') | new motifs |
| cisCons.YeoClustUp.118.TCTCT.I1    | (n)PTB   | I1(3') | new motifs |
| cisCons.YeoClustUp.119.TTAACA.I1   | Motif.I1 | I1(3') | new motifs |
| cisCons.YeoClustUp.120.TTTGGT.I1   | Motif.I1 | I1(3') | new motifs |
| cisCons.YeoClustUp.121.TGTCT.I1    | (n)PTB   | I1(3') | new motifs |
| cisCons.YeoClustUp.122.TTCCTT.I1   | Motif.I1 | I1(3') | new motifs |
| cisCons.YeoClustUp.123.TGAATT.I1   | Motif.I1 | I1(3') | new motifs |
| cisCons.YeoClustUp.124.AATTTA.I1   | Motif.I1 | I1(3') | new motifs |
| cisCons.YeoClustUp.125.GTTTCT.I1   | (n)PTB   | I1(3') | new motifs |
| cisCons.YeoClustUp.126.TGCTAA.I1   | Motif.I1 | I1(3') | new motifs |
| cisCons.YeoClustUp.127.AGATTT.I1   | Motif.I1 | I1(3') | new motifs |
| cisCons.YeoClustUp.128.GAAAAT.I1   | Motif.I1 | I1(3') | new motifs |
| cisCons.YeoClustUp.129.GTTTAAT.I1  | Motif.I1 | I1(3') | new motifs |
| cisCons.YeoClustUp.130.TTTGACT.I1  | Motif.I1 | I1(3') | new motifs |
| cisCons.YeoClustUp.131.TCTGA.I1    | (n)PTB   | I1(3') | new motifs |
| cisCons.YeoClustUp.132.TCTGTT.I1   | (n)PTB   | I1(3') | new motifs |

---

---

|                                   |          |        |            |
|-----------------------------------|----------|--------|------------|
| cisCons.YeoClustUp.133.TTTATTC.II | Motif.II | II(3') | new motifs |
| cisCons.YeoClustUp.134.TGAAAG.II  | Motif.II | II(3') | new motifs |
| cisCons.YeoClustUp.135.TGTTCT.II  | (n)PTB   | II(3') | new motifs |
| cisCons.YeoClustUp.136.CTTTT.II   | Motif.II | II(3') | new motifs |
| cisCons.YeoClustUp.137.ATTTGT.II  | Motif.II | II(3') | new motifs |
| cisCons.YeoClustUp.138.TGAGT.II   | Motif.II | II(3') | new motifs |
| cisCons.YeoClustUp.139.CCCCAG.II  | Motif.II | II(3') | new motifs |
| cisCons.YeoClustUp.140.TTGCAG.II  | Motif.II | II(3') | new motifs |
| cisCons.YeoClustUp.141.CTGAT.II   | Motif.II | II(3') | new motifs |
| cisCons.YeoClustUp.142.TAATA.II   | Motif.II | II(3') | new motifs |
| cisCons.YeoClustUp.143.TCTTA.II   | (n)PTB   | II(3') | new motifs |
| cisCons.YeoClustUp.144.ATTCT.II   | (n)PTB   | II(3') | new motifs |
| cisCons.YeoClustUp.145.ATCAA.II   | Motif.II | II(3') | new motifs |
| cisCons.YeoClustUp.146.CTTTA.II   | Motif.II | II(3') | new motifs |
| cisCons.YeoClustUp.147.TTTAG.II   | Motif.II | II(3') | new motifs |
| cisCons.YeoClustUp.148.TTGCTG.II  | Motif.II | II(3') | new motifs |
| cisCons.YeoClustUp.149.TTTCAT.II  | Motif.II | II(3') | new motifs |
| cisCons.YeoClustUp.150.CTTTCA.II  | Motif.II | II(3') | new motifs |
| cisCons.YeoClustUp.151.TTCTC.II   | (n)PTB   | II(3') | new motifs |
| cisCons.YeoClustUp.152.TGCTT.II   | Motif.II | II(3') | new motifs |
| cisCons.YeoClustUp.153.TCTGC.II   | (n)PTB   | II(3') | new motifs |
| cisCons.YeoClustUp.154.CTGAA.II   | Motif.II | II(3') | new motifs |
| cisCons.YeoClustUp.155.GTAGGT.II  | Motif.II | II(3') | new motifs |
| cisCons.YeoClustUp.156.CTAAA.II   | Motif.II | II(3') | new motifs |
| cis.ESS.Burge.A                   | ESS      | A      | new motifs |
| cis.ESS.Burge.C1                  | ESS      | C1     | new motifs |
| cis.ESS.Burge.C2                  | ESS      | C2     | new motifs |
| cis.ESE.Burge.A                   | ESE      | A      | new motifs |
| cis.ESE.Burge.C1                  | ESE      | C1     | new motifs |
| cis.ESE.Burge.C2                  | ESE      | C2     | new motifs |
| cis.ESS.Chasin.A                  | ESS      | A      | new motifs |
| cis.ESS.Chasin.C1                 | ESS      | C1     | new motifs |
| cis.ESS.Chasin.C2                 | ESS      | C2     | new motifs |
| cis.ESE.Chasin.A                  | ESE      | A      | new motifs |

---

---

|                      |              |        |              |
|----------------------|--------------|--------|--------------|
| cis.ESE.Chasin.C1    | ESE          | C1     | new motifs   |
| cis.ESE.Chasin.C2    | ESE          | C2     | new motifs   |
| cis.ShortSeq.AG.C2I2 | NucFreq.C2I2 | I2(3') | short motifs |
| cis.ShortSeq.AT.C2I2 | NucFreq.C2I2 | I2(3') | short motifs |
| cis.ShortSeq.CA.C2I2 | NucFreq.C2I2 | I2(3') | short motifs |
| cis.ShortSeq.CC.C2I2 | NucFreq.C2I2 | I2(3') | short motifs |
| cis.ShortSeq.CG.C2I2 | NucFreq.C2I2 | I2(3') | short motifs |
| cis.ShortSeq.CT.C2I2 | NucFreq.C2I2 | I2(3') | short motifs |
| cis.ShortSeq.GA.C2I2 | NucFreq.C2I2 | I2(3') | short motifs |
| cis.ShortSeq.GC.C2I2 | NucFreq.C2I2 | I2(3') | short motifs |
| cis.ShortSeq.GG.C2I2 | NucFreq.C2I2 | I2(3') | short motifs |
| cis.ShortSeq.GT.C2I2 | NucFreq.C2I2 | I2(3') | short motifs |
| cis.ShortSeq.TA.C2I2 | NucFreq.C2I2 | I2(3') | short motifs |
| cis.ShortSeq.TC.C2I2 | NucFreq.C2I2 | I2(3') | short motifs |
| cis.ShortSeq.TG.C2I2 | NucFreq.C2I2 | I2(3') | short motifs |
| cis.ShortSeq.TT.C2I2 | NucFreq.C2I2 | I2(3') | short motifs |
| cis.ShortSeq.A.C1    | NucFreq.C1   | C1     | short motifs |
| cis.ShortSeq.C.C1    | NucFreq.C1   | C1     | short motifs |
| cis.ShortSeq.G.C1    | NucFreq.C1   | C1     | short motifs |
| cis.ShortSeq.T.C1    | NucFreq.C1   | C1     | short motifs |
| cis.ShortSeq.AA.C1   | NucFreq.C1   | C1     | short motifs |
| cis.ShortSeq.AC.C1   | NucFreq.C1   | C1     | short motifs |
| cis.ShortSeq.AG.C1   | NucFreq.C1   | C1     | short motifs |
| cis.ShortSeq.AT.C1   | NucFreq.C1   | C1     | short motifs |
| cis.ShortSeq.CA.C1   | NucFreq.C1   | C1     | short motifs |
| cis.ShortSeq.CC.C1   | NucFreq.C1   | C1     | short motifs |
| cis.ShortSeq.CG.C1   | NucFreq.C1   | C1     | short motifs |
| cis.ShortSeq.CT.C1   | NucFreq.C1   | C1     | short motifs |
| cis.ShortSeq.GA.C1   | NucFreq.C1   | C1     | short motifs |
| cis.ShortSeq.GC.C1   | NucFreq.C1   | C1     | short motifs |
| cis.ShortSeq.GG.C1   | NucFreq.C1   | C1     | short motifs |
| cis.ShortSeq.GT.C1   | NucFreq.C1   | C1     | short motifs |
| cis.ShortSeq.TA.C1   | NucFreq.C1   | C1     | short motifs |
| cis.ShortSeq.TC.C1   | NucFreq.C1   | C1     | short motifs |

---



---

|                     |            |    |              |
|---------------------|------------|----|--------------|
| cis.ShortSeq.TG.C1  | NucFreq.C1 | C1 | short motifs |
| cis.ShortSeq.TT.C1  | NucFreq.C1 | C1 | short motifs |
| cis.ShortSeq.AAA.C1 | NucFreq.C1 | C1 | short motifs |
| cis.ShortSeq.AAC.C1 | NucFreq.C1 | C1 | short motifs |
| cis.ShortSeq.AAG.C1 | NucFreq.C1 | C1 | short motifs |
| cis.ShortSeq.AAT.C1 | NucFreq.C1 | C1 | short motifs |
| cis.ShortSeq.ACA.C1 | NucFreq.C1 | C1 | short motifs |
| cis.ShortSeq.ACC.C1 | NucFreq.C1 | C1 | short motifs |
| cis.ShortSeq.ACG.C1 | NucFreq.C1 | C1 | short motifs |
| cis.ShortSeq.ACT.C1 | NucFreq.C1 | C1 | short motifs |
| cis.ShortSeq.AGA.C1 | NucFreq.C1 | C1 | short motifs |
| cis.ShortSeq.AGC.C1 | NucFreq.C1 | C1 | short motifs |
| cis.ShortSeq.AGG.C1 | NucFreq.C1 | C1 | short motifs |
| cis.ShortSeq.AGT.C1 | NucFreq.C1 | C1 | short motifs |
| cis.ShortSeq.ATA.C1 | NucFreq.C1 | C1 | short motifs |
| cis.ShortSeq.ATC.C1 | NucFreq.C1 | C1 | short motifs |
| cis.ShortSeq.ATG.C1 | NucFreq.C1 | C1 | short motifs |
| cis.ShortSeq.ATT.C1 | NucFreq.C1 | C1 | short motifs |
| cis.ShortSeq.CAA.C1 | NucFreq.C1 | C1 | short motifs |
| cis.ShortSeq.CAC.C1 | NucFreq.C1 | C1 | short motifs |
| cis.ShortSeq.CAG.C1 | NucFreq.C1 | C1 | short motifs |
| cis.ShortSeq.CAT.C1 | NucFreq.C1 | C1 | short motifs |
| cis.ShortSeq.CCA.C1 | NucFreq.C1 | C1 | short motifs |
| cis.ShortSeq.CCC.C1 | NucFreq.C1 | C1 | short motifs |
| cis.ShortSeq.CCG.C1 | NucFreq.C1 | C1 | short motifs |
| cis.ShortSeq.CCT.C1 | NucFreq.C1 | C1 | short motifs |
| cis.ShortSeq.CGA.C1 | NucFreq.C1 | C1 | short motifs |
| cis.ShortSeq.CGC.C1 | NucFreq.C1 | C1 | short motifs |
| cis.ShortSeq.CGG.C1 | NucFreq.C1 | C1 | short motifs |
| cis.ShortSeq.CGT.C1 | NucFreq.C1 | C1 | short motifs |
| cis.ShortSeq.CTA.C1 | NucFreq.C1 | C1 | short motifs |
| cis.ShortSeq.CTC.C1 | NucFreq.C1 | C1 | short motifs |
| cis.ShortSeq.CTG.C1 | NucFreq.C1 | C1 | short motifs |
| cis.ShortSeq.CTT.C1 | NucFreq.C1 | C1 | short motifs |

---

---

|                     |            |    |              |
|---------------------|------------|----|--------------|
| cis.ShortSeq.GAA.C1 | NucFreq.C1 | C1 | short motifs |
| cis.ShortSeq.GAC.C1 | NucFreq.C1 | C1 | short motifs |
| cis.ShortSeq.GAG.C1 | NucFreq.C1 | C1 | short motifs |
| cis.ShortSeq.GAT.C1 | NucFreq.C1 | C1 | short motifs |
| cis.ShortSeq.GCA.C1 | NucFreq.C1 | C1 | short motifs |
| cis.ShortSeq.GCC.C1 | NucFreq.C1 | C1 | short motifs |
| cis.ShortSeq.GCG.C1 | NucFreq.C1 | C1 | short motifs |
| cis.ShortSeq.GCT.C1 | NucFreq.C1 | C1 | short motifs |
| cis.ShortSeq.GGA.C1 | NucFreq.C1 | C1 | short motifs |
| cis.ShortSeq.GGC.C1 | NucFreq.C1 | C1 | short motifs |
| cis.ShortSeq.GGG.C1 | NucFreq.C1 | C1 | short motifs |
| cis.ShortSeq.GGT.C1 | NucFreq.C1 | C1 | short motifs |
| cis.ShortSeq.GTA.C1 | NucFreq.C1 | C1 | short motifs |
| cis.ShortSeq.GTC.C1 | NucFreq.C1 | C1 | short motifs |
| cis.ShortSeq.GTG.C1 | NucFreq.C1 | C1 | short motifs |
| cis.ShortSeq.GTT.C1 | NucFreq.C1 | C1 | short motifs |
| cis.ShortSeq.TAA.C1 | NucFreq.C1 | C1 | short motifs |
| cis.ShortSeq.TAC.C1 | NucFreq.C1 | C1 | short motifs |
| cis.ShortSeq.TAG.C1 | NucFreq.C1 | C1 | short motifs |
| cis.ShortSeq.TAT.C1 | NucFreq.C1 | C1 | short motifs |
| cis.ShortSeq.TCA.C1 | NucFreq.C1 | C1 | short motifs |
| cis.ShortSeq.TCC.C1 | NucFreq.C1 | C1 | short motifs |
| cis.ShortSeq.TCG.C1 | NucFreq.C1 | C1 | short motifs |
| cis.ShortSeq.TCT.C1 | NucFreq.C1 | C1 | short motifs |
| cis.ShortSeq.TGA.C1 | NucFreq.C1 | C1 | short motifs |
| cis.ShortSeq.TGC.C1 | NucFreq.C1 | C1 | short motifs |
| cis.ShortSeq.TGG.C1 | NucFreq.C1 | C1 | short motifs |
| cis.ShortSeq.TGT.C1 | NucFreq.C1 | C1 | short motifs |
| cis.ShortSeq.TTA.C1 | NucFreq.C1 | C1 | short motifs |
| cis.ShortSeq.TTC.C1 | NucFreq.C1 | C1 | short motifs |
| cis.ShortSeq.TTG.C1 | NucFreq.C1 | C1 | short motifs |
| cis.ShortSeq.TTT.C1 | NucFreq.C1 | C1 | short motifs |
| cis.ShortSeq.A.C2   | NucFreq.C2 | C2 | short motifs |
| cis.ShortSeq.C.C2   | NucFreq.C2 | C2 | short motifs |

---

---

|                     |            |    |              |
|---------------------|------------|----|--------------|
| cis.ShortSeq.G.C2   | NucFreq.C2 | C2 | short motifs |
| cis.ShortSeq.T.C2   | NucFreq.C2 | C2 | short motifs |
| cis.ShortSeq.AA.C2  | NucFreq.C2 | C2 | short motifs |
| cis.ShortSeq.AC.C2  | NucFreq.C2 | C2 | short motifs |
| cis.ShortSeq.AG.C2  | NucFreq.C2 | C2 | short motifs |
| cis.ShortSeq.AT.C2  | NucFreq.C2 | C2 | short motifs |
| cis.ShortSeq.CA.C2  | NucFreq.C2 | C2 | short motifs |
| cis.ShortSeq.CC.C2  | NucFreq.C2 | C2 | short motifs |
| cis.ShortSeq.CG.C2  | NucFreq.C2 | C2 | short motifs |
| cis.ShortSeq.CT.C2  | NucFreq.C2 | C2 | short motifs |
| cis.ShortSeq.GA.C2  | NucFreq.C2 | C2 | short motifs |
| cis.ShortSeq.GC.C2  | NucFreq.C2 | C2 | short motifs |
| cis.ShortSeq.GG.C2  | NucFreq.C2 | C2 | short motifs |
| cis.ShortSeq.GT.C2  | NucFreq.C2 | C2 | short motifs |
| cis.ShortSeq.TA.C2  | NucFreq.C2 | C2 | short motifs |
| cis.ShortSeq.TC.C2  | NucFreq.C2 | C2 | short motifs |
| cis.ShortSeq.TG.C2  | NucFreq.C2 | C2 | short motifs |
| cis.ShortSeq.TT.C2  | NucFreq.C2 | C2 | short motifs |
| cis.ShortSeq.AAA.C2 | NucFreq.C2 | C2 | short motifs |
| cis.ShortSeq.AAC.C2 | NucFreq.C2 | C2 | short motifs |
| cis.ShortSeq.AAG.C2 | NucFreq.C2 | C2 | short motifs |
| cis.ShortSeq.AAT.C2 | NucFreq.C2 | C2 | short motifs |
| cis.ShortSeq.ACA.C2 | NucFreq.C2 | C2 | short motifs |
| cis.ShortSeq.ACC.C2 | NucFreq.C2 | C2 | short motifs |
| cis.ShortSeq.ACG.C2 | NucFreq.C2 | C2 | short motifs |
| cis.ShortSeq.ACT.C2 | NucFreq.C2 | C2 | short motifs |
| cis.ShortSeq.AGA.C2 | NucFreq.C2 | C2 | short motifs |
| cis.ShortSeq.AGC.C2 | NucFreq.C2 | C2 | short motifs |
| cis.ShortSeq.AGG.C2 | NucFreq.C2 | C2 | short motifs |
| cis.ShortSeq.AGT.C2 | NucFreq.C2 | C2 | short motifs |
| cis.ShortSeq.ATA.C2 | NucFreq.C2 | C2 | short motifs |
| cis.ShortSeq.ATC.C2 | NucFreq.C2 | C2 | short motifs |
| cis.ShortSeq.ATG.C2 | NucFreq.C2 | C2 | short motifs |
| cis.ShortSeq.ATT.C2 | NucFreq.C2 | C2 | short motifs |

---

---

|                     |            |    |              |
|---------------------|------------|----|--------------|
| cis.ShortSeq.CAA.C2 | NucFreq.C2 | C2 | short motifs |
| cis.ShortSeq.CAC.C2 | NucFreq.C2 | C2 | short motifs |
| cis.ShortSeq.CAG.C2 | NucFreq.C2 | C2 | short motifs |
| cis.ShortSeq.CAT.C2 | NucFreq.C2 | C2 | short motifs |
| cis.ShortSeq.CCA.C2 | NucFreq.C2 | C2 | short motifs |
| cis.ShortSeq.CCC.C2 | NucFreq.C2 | C2 | short motifs |
| cis.ShortSeq.CCG.C2 | NucFreq.C2 | C2 | short motifs |
| cis.ShortSeq.CCT.C2 | NucFreq.C2 | C2 | short motifs |
| cis.ShortSeq.CGA.C2 | NucFreq.C2 | C2 | short motifs |
| cis.ShortSeq.CGC.C2 | NucFreq.C2 | C2 | short motifs |
| cis.ShortSeq.CGG.C2 | NucFreq.C2 | C2 | short motifs |
| cis.ShortSeq.CGT.C2 | NucFreq.C2 | C2 | short motifs |
| cis.ShortSeq.CTA.C2 | NucFreq.C2 | C2 | short motifs |
| cis.ShortSeq.CTC.C2 | NucFreq.C2 | C2 | short motifs |
| cis.ShortSeq.CTG.C2 | NucFreq.C2 | C2 | short motifs |
| cis.ShortSeq.CTT.C2 | NucFreq.C2 | C2 | short motifs |
| cis.ShortSeq.GAA.C2 | NucFreq.C2 | C2 | short motifs |
| cis.ShortSeq.GAC.C2 | NucFreq.C2 | C2 | short motifs |
| cis.ShortSeq.GAG.C2 | NucFreq.C2 | C2 | short motifs |
| cis.ShortSeq.GAT.C2 | NucFreq.C2 | C2 | short motifs |
| cis.ShortSeq.GCA.C2 | NucFreq.C2 | C2 | short motifs |
| cis.ShortSeq.GCC.C2 | NucFreq.C2 | C2 | short motifs |
| cis.ShortSeq.GCG.C2 | NucFreq.C2 | C2 | short motifs |
| cis.ShortSeq.GCT.C2 | NucFreq.C2 | C2 | short motifs |
| cis.ShortSeq.GGA.C2 | NucFreq.C2 | C2 | short motifs |
| cis.ShortSeq.GGC.C2 | NucFreq.C2 | C2 | short motifs |
| cis.ShortSeq.GGG.C2 | NucFreq.C2 | C2 | short motifs |
| cis.ShortSeq.GGT.C2 | NucFreq.C2 | C2 | short motifs |
| cis.ShortSeq.GTA.C2 | NucFreq.C2 | C2 | short motifs |
| cis.ShortSeq.GTC.C2 | NucFreq.C2 | C2 | short motifs |
| cis.ShortSeq.GTG.C2 | NucFreq.C2 | C2 | short motifs |
| cis.ShortSeq.GTT.C2 | NucFreq.C2 | C2 | short motifs |
| cis.ShortSeq.TAA.C2 | NucFreq.C2 | C2 | short motifs |
| cis.ShortSeq.TAC.C2 | NucFreq.C2 | C2 | short motifs |

---

---

|                     |            |    |              |
|---------------------|------------|----|--------------|
| cis.ShortSeq.TAG.C2 | NucFreq.C2 | C2 | short motifs |
| cis.ShortSeq.TAT.C2 | NucFreq.C2 | C2 | short motifs |
| cis.ShortSeq.TCA.C2 | NucFreq.C2 | C2 | short motifs |
| cis.ShortSeq.TCC.C2 | NucFreq.C2 | C2 | short motifs |
| cis.ShortSeq.TCG.C2 | NucFreq.C2 | C2 | short motifs |
| cis.ShortSeq.TCT.C2 | NucFreq.C2 | C2 | short motifs |
| cis.ShortSeq.TGA.C2 | NucFreq.C2 | C2 | short motifs |
| cis.ShortSeq.TGC.C2 | NucFreq.C2 | C2 | short motifs |
| cis.ShortSeq.TGG.C2 | NucFreq.C2 | C2 | short motifs |
| cis.ShortSeq.TGT.C2 | NucFreq.C2 | C2 | short motifs |
| cis.ShortSeq.TTA.C2 | NucFreq.C2 | C2 | short motifs |
| cis.ShortSeq.TTC.C2 | NucFreq.C2 | C2 | short motifs |
| cis.ShortSeq.TTG.C2 | NucFreq.C2 | C2 | short motifs |
| cis.ShortSeq.TTT.C2 | NucFreq.C2 | C2 | short motifs |
| cis.ShortSeq.A.A    | NucFreq.A  | A  | short motifs |
| cis.ShortSeq.C.A    | NucFreq.A  | A  | short motifs |
| cis.ShortSeq.G.A    | NucFreq.A  | A  | short motifs |
| cis.ShortSeq.T.A    | NucFreq.A  | A  | short motifs |
| cis.ShortSeq.AA.A   | NucFreq.A  | A  | short motifs |
| cis.ShortSeq.AC.A   | NucFreq.A  | A  | short motifs |
| cis.ShortSeq.AG.A   | NucFreq.A  | A  | short motifs |
| cis.ShortSeq.AT.A   | NucFreq.A  | A  | short motifs |
| cis.ShortSeq.CA.A   | NucFreq.A  | A  | short motifs |
| cis.ShortSeq.CC.A   | NucFreq.A  | A  | short motifs |
| cis.ShortSeq.CG.A   | NucFreq.A  | A  | short motifs |
| cis.ShortSeq.CT.A   | NucFreq.A  | A  | short motifs |
| cis.ShortSeq.GA.A   | NucFreq.A  | A  | short motifs |
| cis.ShortSeq.GC.A   | NucFreq.A  | A  | short motifs |
| cis.ShortSeq.GG.A   | NucFreq.A  | A  | short motifs |
| cis.ShortSeq.GT.A   | NucFreq.A  | A  | short motifs |
| cis.ShortSeq.TA.A   | NucFreq.A  | A  | short motifs |
| cis.ShortSeq.TC.A   | NucFreq.A  | A  | short motifs |
| cis.ShortSeq.TG.A   | NucFreq.A  | A  | short motifs |
| cis.ShortSeq.TT.A   | NucFreq.A  | A  | short motifs |

---

---

|                    |           |   |              |
|--------------------|-----------|---|--------------|
| cis.ShortSeq.AAA.A | NucFreq.A | A | short motifs |
| cis.ShortSeq.AAC.A | NucFreq.A | A | short motifs |
| cis.ShortSeq.AAG.A | NucFreq.A | A | short motifs |
| cis.ShortSeq.AAT.A | NucFreq.A | A | short motifs |
| cis.ShortSeq.ACA.A | NucFreq.A | A | short motifs |
| cis.ShortSeq.ACC.A | NucFreq.A | A | short motifs |
| cis.ShortSeq.ACG.A | NucFreq.A | A | short motifs |
| cis.ShortSeq.ACT.A | NucFreq.A | A | short motifs |
| cis.ShortSeq.AGA.A | NucFreq.A | A | short motifs |
| cis.ShortSeq.AGC.A | NucFreq.A | A | short motifs |
| cis.ShortSeq.AGG.A | NucFreq.A | A | short motifs |
| cis.ShortSeq.AGT.A | NucFreq.A | A | short motifs |
| cis.ShortSeq.ATA.A | NucFreq.A | A | short motifs |
| cis.ShortSeq.ATC.A | NucFreq.A | A | short motifs |
| cis.ShortSeq.ATG.A | NucFreq.A | A | short motifs |
| cis.ShortSeq.ATT.A | NucFreq.A | A | short motifs |
| cis.ShortSeq.CAA.A | NucFreq.A | A | short motifs |
| cis.ShortSeq.CAC.A | NucFreq.A | A | short motifs |
| cis.ShortSeq.CAG.A | NucFreq.A | A | short motifs |
| cis.ShortSeq.CAT.A | NucFreq.A | A | short motifs |
| cis.ShortSeq.CCA.A | NucFreq.A | A | short motifs |
| cis.ShortSeq.CCC.A | NucFreq.A | A | short motifs |
| cis.ShortSeq.CCG.A | NucFreq.A | A | short motifs |
| cis.ShortSeq.CCT.A | NucFreq.A | A | short motifs |
| cis.ShortSeq.CGA.A | NucFreq.A | A | short motifs |
| cis.ShortSeq.CGC.A | NucFreq.A | A | short motifs |
| cis.ShortSeq.CGG.A | NucFreq.A | A | short motifs |
| cis.ShortSeq.CGT.A | NucFreq.A | A | short motifs |
| cis.ShortSeq.CTA.A | NucFreq.A | A | short motifs |
| cis.ShortSeq.CTC.A | NucFreq.A | A | short motifs |
| cis.ShortSeq.CTG.A | NucFreq.A | A | short motifs |
| cis.ShortSeq.CTT.A | NucFreq.A | A | short motifs |
| cis.ShortSeq.GAA.A | NucFreq.A | A | short motifs |
| cis.ShortSeq.GAC.A | NucFreq.A | A | short motifs |

---

---

|                    |            |        |              |
|--------------------|------------|--------|--------------|
| cis.ShortSeq.GAG.A | NucFreq.A  | A      | short motifs |
| cis.ShortSeq.GAT.A | NucFreq.A  | A      | short motifs |
| cis.ShortSeq.GCA.A | NucFreq.A  | A      | short motifs |
| cis.ShortSeq.GCC.A | NucFreq.A  | A      | short motifs |
| cis.ShortSeq.GCG.A | NucFreq.A  | A      | short motifs |
| cis.ShortSeq.GCT.A | NucFreq.A  | A      | short motifs |
| cis.ShortSeq.GGA.A | NucFreq.A  | A      | short motifs |
| cis.ShortSeq.GGC.A | NucFreq.A  | A      | short motifs |
| cis.ShortSeq.GGG.A | NucFreq.A  | A      | short motifs |
| cis.ShortSeq.GGT.A | NucFreq.A  | A      | short motifs |
| cis.ShortSeq.GTA.A | NucFreq.A  | A      | short motifs |
| cis.ShortSeq.GTC.A | NucFreq.A  | A      | short motifs |
| cis.ShortSeq.GTG.A | NucFreq.A  | A      | short motifs |
| cis.ShortSeq.GTT.A | NucFreq.A  | A      | short motifs |
| cis.ShortSeq.TAA.A | NucFreq.A  | A      | short motifs |
| cis.ShortSeq.TAC.A | NucFreq.A  | A      | short motifs |
| cis.ShortSeq.TAG.A | NucFreq.A  | A      | short motifs |
| cis.ShortSeq.TAT.A | NucFreq.A  | A      | short motifs |
| cis.ShortSeq.TCA.A | NucFreq.A  | A      | short motifs |
| cis.ShortSeq.TCC.A | NucFreq.A  | A      | short motifs |
| cis.ShortSeq.TCG.A | NucFreq.A  | A      | short motifs |
| cis.ShortSeq.TCT.A | NucFreq.A  | A      | short motifs |
| cis.ShortSeq.TGA.A | NucFreq.A  | A      | short motifs |
| cis.ShortSeq.TGC.A | NucFreq.A  | A      | short motifs |
| cis.ShortSeq.TGG.A | NucFreq.A  | A      | short motifs |
| cis.ShortSeq.TGT.A | NucFreq.A  | A      | short motifs |
| cis.ShortSeq.TTA.A | NucFreq.A  | A      | short motifs |
| cis.ShortSeq.TTC.A | NucFreq.A  | A      | short motifs |
| cis.ShortSeq.TTG.A | NucFreq.A  | A      | short motifs |
| cis.ShortSeq.TTT.A | NucFreq.A  | A      | short motifs |
| cis.ShortSeq.A.I2  | NucFreq.I2 | I2(5') | short motifs |
| cis.ShortSeq.C.I2  | NucFreq.I2 | I2(5') | short motifs |
| cis.ShortSeq.G.I2  | NucFreq.I2 | I2(5') | short motifs |
| cis.ShortSeq.T.I2  | NucFreq.I2 | I2(5') | short motifs |

---

---

|                     |            |        |              |
|---------------------|------------|--------|--------------|
| cis.ShortSeq.AA.I2  | NucFreq.I2 | I2(5') | short motifs |
| cis.ShortSeq.AC.I2  | NucFreq.I2 | I2(5') | short motifs |
| cis.ShortSeq.AG.I2  | NucFreq.I2 | I2(5') | short motifs |
| cis.ShortSeq.AT.I2  | NucFreq.I2 | I2(5') | short motifs |
| cis.ShortSeq.CA.I2  | NucFreq.I2 | I2(5') | short motifs |
| cis.ShortSeq.CC.I2  | NucFreq.I2 | I2(5') | short motifs |
| cis.ShortSeq.CG.I2  | NucFreq.I2 | I2(5') | short motifs |
| cis.ShortSeq.CT.I2  | NucFreq.I2 | I2(5') | short motifs |
| cis.ShortSeq.GA.I2  | NucFreq.I2 | I2(5') | short motifs |
| cis.ShortSeq.GC.I2  | NucFreq.I2 | I2(5') | short motifs |
| cis.ShortSeq.GG.I2  | NucFreq.I2 | I2(5') | short motifs |
| cis.ShortSeq.GT.I2  | NucFreq.I2 | I2(5') | short motifs |
| cis.ShortSeq.TA.I2  | NucFreq.I2 | I2(5') | short motifs |
| cis.ShortSeq.TC.I2  | NucFreq.I2 | I2(5') | short motifs |
| cis.ShortSeq.TG.I2  | NucFreq.I2 | I2(5') | short motifs |
| cis.ShortSeq.TT.I2  | NucFreq.I2 | I2(5') | short motifs |
| cis.ShortSeq.AAA.I2 | NucFreq.I2 | I2(5') | short motifs |
| cis.ShortSeq.AAC.I2 | NucFreq.I2 | I2(5') | short motifs |
| cis.ShortSeq.AAG.I2 | NucFreq.I2 | I2(5') | short motifs |
| cis.ShortSeq.AAT.I2 | NucFreq.I2 | I2(5') | short motifs |
| cis.ShortSeq.ACA.I2 | NucFreq.I2 | I2(5') | short motifs |
| cis.ShortSeq.ACC.I2 | NucFreq.I2 | I2(5') | short motifs |
| cis.ShortSeq.ACG.I2 | NucFreq.I2 | I2(5') | short motifs |
| cis.ShortSeq.ACT.I2 | NucFreq.I2 | I2(5') | short motifs |
| cis.ShortSeq.AGA.I2 | NucFreq.I2 | I2(5') | short motifs |
| cis.ShortSeq.AGC.I2 | NucFreq.I2 | I2(5') | short motifs |
| cis.ShortSeq.AGG.I2 | NucFreq.I2 | I2(5') | short motifs |
| cis.ShortSeq.AGT.I2 | NucFreq.I2 | I2(5') | short motifs |
| cis.ShortSeq.ATA.I2 | NucFreq.I2 | I2(5') | short motifs |
| cis.ShortSeq.ATC.I2 | NucFreq.I2 | I2(5') | short motifs |
| cis.ShortSeq.ATG.I2 | NucFreq.I2 | I2(5') | short motifs |
| cis.ShortSeq.ATT.I2 | NucFreq.I2 | I2(5') | short motifs |
| cis.ShortSeq.CAA.I2 | NucFreq.I2 | I2(5') | short motifs |
| cis.ShortSeq.CAC.I2 | NucFreq.I2 | I2(5') | short motifs |

---



---

|                     |            |        |              |
|---------------------|------------|--------|--------------|
| cis.ShortSeq.CAG.I2 | NucFreq.I2 | I2(5') | short motifs |
| cis.ShortSeq.CAT.I2 | NucFreq.I2 | I2(5') | short motifs |
| cis.ShortSeq.CCA.I2 | NucFreq.I2 | I2(5') | short motifs |
| cis.ShortSeq.CCC.I2 | NucFreq.I2 | I2(5') | short motifs |
| cis.ShortSeq.CCG.I2 | NucFreq.I2 | I2(5') | short motifs |
| cis.ShortSeq.CCT.I2 | NucFreq.I2 | I2(5') | short motifs |
| cis.ShortSeq.CGA.I2 | NucFreq.I2 | I2(5') | short motifs |
| cis.ShortSeq.CGC.I2 | NucFreq.I2 | I2(5') | short motifs |
| cis.ShortSeq.CGG.I2 | NucFreq.I2 | I2(5') | short motifs |
| cis.ShortSeq.CGT.I2 | NucFreq.I2 | I2(5') | short motifs |
| cis.ShortSeq.CTA.I2 | NucFreq.I2 | I2(5') | short motifs |
| cis.ShortSeq.CTC.I2 | NucFreq.I2 | I2(5') | short motifs |
| cis.ShortSeq.CTG.I2 | NucFreq.I2 | I2(5') | short motifs |
| cis.ShortSeq.CTT.I2 | NucFreq.I2 | I2(5') | short motifs |
| cis.ShortSeq.GAA.I2 | NucFreq.I2 | I2(5') | short motifs |
| cis.ShortSeq.GAC.I2 | NucFreq.I2 | I2(5') | short motifs |
| cis.ShortSeq.GAG.I2 | NucFreq.I2 | I2(5') | short motifs |
| cis.ShortSeq.GAT.I2 | NucFreq.I2 | I2(5') | short motifs |
| cis.ShortSeq.GCA.I2 | NucFreq.I2 | I2(5') | short motifs |
| cis.ShortSeq.GCC.I2 | NucFreq.I2 | I2(5') | short motifs |
| cis.ShortSeq.GCG.I2 | NucFreq.I2 | I2(5') | short motifs |
| cis.ShortSeq.GCT.I2 | NucFreq.I2 | I2(5') | short motifs |
| cis.ShortSeq.GGA.I2 | NucFreq.I2 | I2(5') | short motifs |
| cis.ShortSeq.GGC.I2 | NucFreq.I2 | I2(5') | short motifs |
| cis.ShortSeq.GGG.I2 | NucFreq.I2 | I2(5') | short motifs |
| cis.ShortSeq.GGT.I2 | NucFreq.I2 | I2(5') | short motifs |
| cis.ShortSeq.GTA.I2 | NucFreq.I2 | I2(5') | short motifs |
| cis.ShortSeq.GTC.I2 | NucFreq.I2 | I2(5') | short motifs |
| cis.ShortSeq.GTG.I2 | NucFreq.I2 | I2(5') | short motifs |
| cis.ShortSeq.GTT.I2 | NucFreq.I2 | I2(5') | short motifs |
| cis.ShortSeq.TAA.I2 | NucFreq.I2 | I2(5') | short motifs |
| cis.ShortSeq.TAC.I2 | NucFreq.I2 | I2(5') | short motifs |
| cis.ShortSeq.TAG.I2 | NucFreq.I2 | I2(5') | short motifs |
| cis.ShortSeq.TAT.I2 | NucFreq.I2 | I2(5') | short motifs |

---

---

|                     |            |        |              |
|---------------------|------------|--------|--------------|
| cis.ShortSeq.TCA.I2 | NucFreq.I2 | I2(5') | short motifs |
| cis.ShortSeq.TCC.I2 | NucFreq.I2 | I2(5') | short motifs |
| cis.ShortSeq.TCG.I2 | NucFreq.I2 | I2(5') | short motifs |
| cis.ShortSeq.TCT.I2 | NucFreq.I2 | I2(5') | short motifs |
| cis.ShortSeq.TGA.I2 | NucFreq.I2 | I2(5') | short motifs |
| cis.ShortSeq.TGC.I2 | NucFreq.I2 | I2(5') | short motifs |
| cis.ShortSeq.TGG.I2 | NucFreq.I2 | I2(5') | short motifs |
| cis.ShortSeq.TGT.I2 | NucFreq.I2 | I2(5') | short motifs |
| cis.ShortSeq.TTA.I2 | NucFreq.I2 | I2(5') | short motifs |
| cis.ShortSeq.TTC.I2 | NucFreq.I2 | I2(5') | short motifs |
| cis.ShortSeq.TTG.I2 | NucFreq.I2 | I2(5') | short motifs |
| cis.ShortSeq.TTT.I2 | NucFreq.I2 | I2(5') | short motifs |
| cis.ShortSeq.A.I1   | NucFreq.I1 | I1(3') | short motifs |
| cis.ShortSeq.C.I1   | NucFreq.I1 | I1(3') | short motifs |
| cis.ShortSeq.G.I1   | NucFreq.I1 | I1(3') | short motifs |
| cis.ShortSeq.T.I1   | NucFreq.I1 | I1(3') | short motifs |
| cis.ShortSeq.AA.I1  | NucFreq.I1 | I1(3') | short motifs |
| cis.ShortSeq.AC.I1  | NucFreq.I1 | I1(3') | short motifs |
| cis.ShortSeq.AG.I1  | NucFreq.I1 | I1(3') | short motifs |
| cis.ShortSeq.AT.I1  | NucFreq.I1 | I1(3') | short motifs |
| cis.ShortSeq.CA.I1  | NucFreq.I1 | I1(3') | short motifs |
| cis.ShortSeq.CC.I1  | NucFreq.I1 | I1(3') | short motifs |
| cis.ShortSeq.CG.I1  | NucFreq.I1 | I1(3') | short motifs |
| cis.ShortSeq.CT.I1  | NucFreq.I1 | I1(3') | short motifs |
| cis.ShortSeq.GA.I1  | NucFreq.I1 | I1(3') | short motifs |
| cis.ShortSeq.GC.I1  | NucFreq.I1 | I1(3') | short motifs |
| cis.ShortSeq.GG.I1  | NucFreq.I1 | I1(3') | short motifs |
| cis.ShortSeq.GT.I1  | NucFreq.I1 | I1(3') | short motifs |
| cis.ShortSeq.TA.I1  | NucFreq.I1 | I1(3') | short motifs |
| cis.ShortSeq.TC.I1  | NucFreq.I1 | I1(3') | short motifs |
| cis.ShortSeq.TG.I1  | NucFreq.I1 | I1(3') | short motifs |
| cis.ShortSeq.TT.I1  | NucFreq.I1 | I1(3') | short motifs |
| cis.ShortSeq.AAA.I1 | NucFreq.I1 | I1(3') | short motifs |
| cis.ShortSeq.AAC.I1 | NucFreq.I1 | I1(3') | short motifs |

---

---

|                     |            |        |              |
|---------------------|------------|--------|--------------|
| cis.ShortSeq.AAG.I1 | NucFreq.I1 | I1(3') | short motifs |
| cis.ShortSeq.AAT.I1 | NucFreq.I1 | I1(3') | short motifs |
| cis.ShortSeq.ACA.I1 | NucFreq.I1 | I1(3') | short motifs |
| cis.ShortSeq.ACC.I1 | NucFreq.I1 | I1(3') | short motifs |
| cis.ShortSeq.ACG.I1 | NucFreq.I1 | I1(3') | short motifs |
| cis.ShortSeq.ACT.I1 | NucFreq.I1 | I1(3') | short motifs |
| cis.ShortSeq.AGA.I1 | NucFreq.I1 | I1(3') | short motifs |
| cis.ShortSeq.AGC.I1 | NucFreq.I1 | I1(3') | short motifs |
| cis.ShortSeq.AGG.I1 | NucFreq.I1 | I1(3') | short motifs |
| cis.ShortSeq.AGT.I1 | NucFreq.I1 | I1(3') | short motifs |
| cis.ShortSeq.ATA.I1 | NucFreq.I1 | I1(3') | short motifs |
| cis.ShortSeq.ATC.I1 | NucFreq.I1 | I1(3') | short motifs |
| cis.ShortSeq.ATG.I1 | NucFreq.I1 | I1(3') | short motifs |
| cis.ShortSeq.ATT.I1 | NucFreq.I1 | I1(3') | short motifs |
| cis.ShortSeq.CAA.I1 | NucFreq.I1 | I1(3') | short motifs |
| cis.ShortSeq.CAC.I1 | NucFreq.I1 | I1(3') | short motifs |
| cis.ShortSeq.CAG.I1 | NucFreq.I1 | I1(3') | short motifs |
| cis.ShortSeq.CAT.I1 | NucFreq.I1 | I1(3') | short motifs |
| cis.ShortSeq.CCA.I1 | NucFreq.I1 | I1(3') | short motifs |
| cis.ShortSeq.CCC.I1 | NucFreq.I1 | I1(3') | short motifs |
| cis.ShortSeq.CCG.I1 | NucFreq.I1 | I1(3') | short motifs |
| cis.ShortSeq.CCT.I1 | NucFreq.I1 | I1(3') | short motifs |
| cis.ShortSeq.CGA.I1 | NucFreq.I1 | I1(3') | short motifs |
| cis.ShortSeq.CGC.I1 | NucFreq.I1 | I1(3') | short motifs |
| cis.ShortSeq.CGG.I1 | NucFreq.I1 | I1(3') | short motifs |
| cis.ShortSeq.CGT.I1 | NucFreq.I1 | I1(3') | short motifs |
| cis.ShortSeq.CTA.I1 | NucFreq.I1 | I1(3') | short motifs |
| cis.ShortSeq.CTC.I1 | NucFreq.I1 | I1(3') | short motifs |
| cis.ShortSeq.CTG.I1 | NucFreq.I1 | I1(3') | short motifs |
| cis.ShortSeq.CTT.I1 | NucFreq.I1 | I1(3') | short motifs |
| cis.ShortSeq.GAA.I1 | NucFreq.I1 | I1(3') | short motifs |
| cis.ShortSeq.GAC.I1 | NucFreq.I1 | I1(3') | short motifs |
| cis.ShortSeq.GAG.I1 | NucFreq.I1 | I1(3') | short motifs |
| cis.ShortSeq.GAT.I1 | NucFreq.I1 | I1(3') | short motifs |

---

---

|                      |              |        |              |
|----------------------|--------------|--------|--------------|
| cis.ShortSeq.GCA.II  | NucFreq.II   | II(3') | short motifs |
| cis.ShortSeq.GCC.II  | NucFreq.II   | II(3') | short motifs |
| cis.ShortSeq.GCG.II  | NucFreq.II   | II(3') | short motifs |
| cis.ShortSeq.GCT.II  | NucFreq.II   | II(3') | short motifs |
| cis.ShortSeq.GGA.II  | NucFreq.II   | II(3') | short motifs |
| cis.ShortSeq.GGC.II  | NucFreq.II   | II(3') | short motifs |
| cis.ShortSeq.GGG.II  | NucFreq.II   | II(3') | short motifs |
| cis.ShortSeq.GGT.II  | NucFreq.II   | II(3') | short motifs |
| cis.ShortSeq.GTA.II  | NucFreq.II   | II(3') | short motifs |
| cis.ShortSeq.GTC.II  | NucFreq.II   | II(3') | short motifs |
| cis.ShortSeq.GTG.II  | NucFreq.II   | II(3') | short motifs |
| cis.ShortSeq.GTT.II  | NucFreq.II   | II(3') | short motifs |
| cis.ShortSeq.TAA.II  | NucFreq.II   | II(3') | short motifs |
| cis.ShortSeq.TAC.II  | NucFreq.II   | II(3') | short motifs |
| cis.ShortSeq.TAG.II  | NucFreq.II   | II(3') | short motifs |
| cis.ShortSeq.TAT.II  | NucFreq.II   | II(3') | short motifs |
| cis.ShortSeq.TCA.II  | NucFreq.II   | II(3') | short motifs |
| cis.ShortSeq.TCC.II  | NucFreq.II   | II(3') | short motifs |
| cis.ShortSeq.TCG.II  | NucFreq.II   | II(3') | short motifs |
| cis.ShortSeq.TCT.II  | NucFreq.II   | II(3') | short motifs |
| cis.ShortSeq.TGA.II  | NucFreq.II   | II(3') | short motifs |
| cis.ShortSeq.TGC.II  | NucFreq.II   | II(3') | short motifs |
| cis.ShortSeq.TGG.II  | NucFreq.II   | II(3') | short motifs |
| cis.ShortSeq.TGT.II  | NucFreq.II   | II(3') | short motifs |
| cis.ShortSeq.TTA.II  | NucFreq.II   | II(3') | short motifs |
| cis.ShortSeq.TTC.II  | NucFreq.II   | II(3') | short motifs |
| cis.ShortSeq.TTG.II  | NucFreq.II   | II(3') | short motifs |
| cis.ShortSeq.TTT.II  | NucFreq.II   | II(3') | short motifs |
| cis.ShortSeq.A.C1I1  | NucFreq.C1I1 | II(5') | short motifs |
| cis.ShortSeq.C.C1I1  | NucFreq.C1I1 | II(5') | short motifs |
| cis.ShortSeq.G.C1I1  | NucFreq.C1I1 | II(5') | short motifs |
| cis.ShortSeq.T.C1I1  | NucFreq.C1I1 | II(5') | short motifs |
| cis.ShortSeq.AA.C1I1 | NucFreq.C1I1 | II(5') | short motifs |
| cis.ShortSeq.AC.C1I1 | NucFreq.C1I1 | II(5') | short motifs |

---

---

|                      |              |        |                               |
|----------------------|--------------|--------|-------------------------------|
| cis.ShortSeq.AG.C1I1 | NucFreq.C1I1 | I1(5') | short motifs                  |
| cis.ShortSeq.AT.C1I1 | NucFreq.C1I1 | I1(5') | short motifs                  |
| cis.ShortSeq.CA.C1I1 | NucFreq.C1I1 | I1(5') | short motifs                  |
| cis.ShortSeq.CC.C1I1 | NucFreq.C1I1 | I1(5') | short motifs                  |
| cis.ShortSeq.CG.C1I1 | NucFreq.C1I1 | I1(5') | short motifs                  |
| cis.ShortSeq.CT.C1I1 | NucFreq.C1I1 | I1(5') | short motifs                  |
| cis.ShortSeq.GA.C1I1 | NucFreq.C1I1 | I1(5') | short motifs                  |
| cis.ShortSeq.GC.C1I1 | NucFreq.C1I1 | I1(5') | short motifs                  |
| cis.ShortSeq.GG.C1I1 | NucFreq.C1I1 | I1(5') | short motifs                  |
| cis.ShortSeq.GT.C1I1 | NucFreq.C1I1 | I1(5') | short motifs                  |
| cis.ShortSeq.TA.C1I1 | NucFreq.C1I1 | I1(5') | short motifs                  |
| cis.ShortSeq.TC.C1I1 | NucFreq.C1I1 | I1(5') | short motifs                  |
| cis.ShortSeq.TG.C1I1 | NucFreq.C1I1 | I1(5') | short motifs                  |
| cis.ShortSeq.TT.C1I1 | NucFreq.C1I1 | I1(5') | short motifs                  |
| cis.ShortSeq.A.C2I2  | NucFreq.C2I2 | I2(3') | short motifs                  |
| cis.ShortSeq.C.C2I2  | NucFreq.C2I2 | I2(3') | short motifs                  |
| cis.ShortSeq.G.C2I2  | NucFreq.C2I2 | I2(3') | short motifs                  |
| cis.ShortSeq.T.C2I2  | NucFreq.C2I2 | I2(3') | short motifs                  |
| cis.ShortSeq.AA.C2I2 | NucFreq.C2I2 | I2(3') | short motifs                  |
| JuncScore.C1I1       | JuncScore    | NaN    | transcript structure features |
| JuncScore.C2I2       | JuncScore    | NaN    | transcript structure features |
| Len.C1               | Len          | C1     | transcript structure features |
| Len.A                | Len          | A      | transcript structure features |
| Len.C2               | Len          | C2     | transcript structure features |
| Len.I1               | Len          | I1(3') | transcript structure features |
| Len.I2               | Len          | I2(5') | transcript structure features |
| Len.Ratio.A_I1       | Len          | NaN    | transcript structure features |
| Len.Ratio.A_I2       | Len          | NaN    | transcript structure features |
| Len.Ratio.I1_I2      | Len          | NaN    | transcript structure features |
| Frame.shift.NaN      | Shift        | NaN    | transcript structure features |
| AltAGpos             | AltAGpos     | I1(3') | transcript structure features |
| AltGTpos             | AltGTpos     | I2(5') | transcript structure features |
| Cons.MeanP1_100.C1I1 | Cons         | I1(5') | transcript structure features |
| Cons.MeanP1_100.C2I2 | Cons         | I2(3') | transcript structure features |

---

---

|                              |             |        |                               |
|------------------------------|-------------|--------|-------------------------------|
| Cons.MeanP1_100.I1           | Cons        | I1(3') | transcript structure features |
| Cons.MeanP1_100.I2           | Cons        | I2(5') | transcript structure features |
| SecStr.maxJunc.C1I1          | SecStr.C1I1 | I1(5') | transcript structure features |
| SecStr.avgJunc.C1I1          | SecStr.C1I1 | I1(5') | transcript structure features |
| SecStr.maxJunc.AI1           | SecStr.I1   | I1(3') | transcript structure features |
| SecStr.avgJunc.AI1           | SecStr.I1   | I1(3') | transcript structure features |
| Frame.noShift.NaN            | Shift       | NaN    | transcript structure features |
| SecStr.maxJunc.AI2           | SecStr.I2   | I2(5') | transcript structure features |
| SecStr.avgJunc.AI2           | SecStr.I2   | I2(5') | transcript structure features |
| SecStr.maxJunc.C2I2          | SecStr.C2I2 | I2(3') | transcript structure features |
| SecStr.avgJunc.C2I2          | SecStr.C2I2 | I2(3') | transcript structure features |
| SecStr.max1_70.C1I1          | SecStr.C1I1 | I1(5') | transcript structure features |
| SecStr.avg1_70.C1I1          | SecStr.C1I1 | I1(5') | transcript structure features |
| SecStr.max71_140.C1I1        | SecStr.C1I1 | I1(5') | transcript structure features |
| SecStr.avg71_140.C1I1        | SecStr.C1I1 | I1(5') | transcript structure features |
| SecStr.max141_210.C1I1       | SecStr.C1I1 | I1(5') | transcript structure features |
| SecStr.avg141_210.C1I1       | SecStr.C1I1 | I1(5') | transcript structure features |
| PTC.NotMined.NaN             | PTC         | NaN    | transcript structure features |
| SecStr.max1_70.AI2           | SecStr.I2   | I2(5') | transcript structure features |
| SecStr.avg1_70.AI2           | SecStr.I2   | I2(5') | transcript structure features |
| SecStr.max71_140.AI2         | SecStr.I2   | I2(5') | transcript structure features |
| SecStr.avg71_140.AI2         | SecStr.I2   | I2(5') | transcript structure features |
| SecStr.max141_210.AI2        | SecStr.I2   | I2(5') | transcript structure features |
| SecStr.avg141_210.AI2        | SecStr.I2   | I2(5') | transcript structure features |
| SecStr.max1_70.AI1           | SecStr.I1   | I1(3') | transcript structure features |
| SecStr.avg1_70.AI1           | SecStr.I1   | I1(3') | transcript structure features |
| SecStr.max71_140.AI1         | SecStr.I1   | I1(3') | transcript structure features |
| SecStr.avg71_140.AI1         | SecStr.I1   | I1(3') | transcript structure features |
| PTC.ExcludedFromAnalysis.NaN | PTC         | NaN    | transcript structure features |
| SecStr.max141_210.AI1        | SecStr.I1   | I1(3') | transcript structure features |
| SecStr.avg141_210.AI1        | SecStr.I1   | I1(3') | transcript structure features |
| SecStr.max1_70.C2I2          | SecStr.C2I2 | I2(3') | transcript structure features |
| SecStr.avg1_70.C2I2          | SecStr.C2I2 | I2(3') | transcript structure features |
| SecStr.max71_140.C2I2        | SecStr.C2I2 | I2(3') | transcript structure features |

---

|                        |             |        |                               |
|------------------------|-------------|--------|-------------------------------|
| SecStr.avg71_140.C2I2  | SecStr.C2I2 | I2(3') | transcript structure features |
| SecStr.max141_210.C2I2 | SecStr.C2I2 | I2(3') | transcript structure features |
| SecStr.avg141_210.C2I2 | SecStr.C2I2 | I2(3') | transcript structure features |
| PTC.NoPTC.NaN          | PTC         | NaN    | transcript structure features |
| PTC.UponInclusion.NaN  | PTC         | NaN    | transcript structure features |
| PTC.UponeExclusion.NaN | PTC         | NaN    | transcript structure features |
| JuncScore.AI1          | JuncScore   | NaN    | transcript structure features |
| JuncScore.AI2          | JuncScore   | NaN    | transcript structure features |

**Table S3** - The identified key features and corresponding MCCs on each data set

|                      | CNS               |            | Muscle            |            | Embryo            |            | Digestive         |            |
|----------------------|-------------------|------------|-------------------|------------|-------------------|------------|-------------------|------------|
|                      | MCC               | # Features | MCC               | # Features | MCC               | # Features | MCC               | # Features |
| Dataset1             | 0.353             | 44         | 0.298             | 59         | 0.237             | 56         | 0.288             | 134        |
| Dataset2             | 0.377             | 42         | 0.375             | 129        | 0.254             | 183        | 0.272             | 127        |
| Dataset3             | 0.407             | 18         | 0.345             | 50         | 0.239             | 81         | 0.218             | 112        |
| Dataset4             | 0.371             | 25         | 0.282             | 187        | 0.227             | 37         | 0.296             | 176        |
| Dataset5             | 0.354             | 37         | 0.338             | 78         | 0.272             | 113        | 0.308             | 156        |
| Dataset6             | 0.377             | 39         | 0.330             | 183        | 0.249             | 53         | 0.226             | 76         |
| MCC (Mean $\pm$ SD*) | 0.373 $\pm$ 0.019 | -          | 0.328 $\pm$ 0.034 | -          | 0.246 $\pm$ 0.016 | -          | 0.268 $\pm$ 0.038 | -          |
| # Combined Features  | -                 | 122        | -                 | 391        | -                 | 343        | -                 | 464        |

\*SD: standard deviation

**Table S4** - The key features for alternative splicing in CNS, muscle, Embryo and digestive tissues

| Key features in CNS tissue | Key features in muscle tissue | Key features in Embryo tissue | Key features in digestive tissue |
|----------------------------|-------------------------------|-------------------------------|----------------------------------|
| Frame.shift.NaN            | Frame.shift.NaN               | cis.Fox.v2.C2I2               | cis.Fox.v1.C2I2                  |
| cis.MBNL.v3.I2             | JuncScore.C1I1                | cis.Fox.v3.C2I2               | cis.Fox.v2.I2                    |
| cisCons.Nova.AI2_C2I2      | cis.Fox.v2.I2                 | cis.Nova.NISS2                | cis.Fox.v3.I2                    |
| cisCons.Fox.v1.I1I2        | cis.GUrich.v1.I2              | cis.Fox.v2.I2                 | cis.GUrich.v2.I2                 |
| cisCons.PTB.v2.I1I2        | cis.GUrich.v2.I2              | cis.GUrich.v2.I2              | cis.Tra2.I2                      |
| cisCons.PTB.v3.I1I2        | cis.GUrich.v4.I2              | cis.GUrich.v3.I2              | cis.UGrich.v1.I2                 |
| cisCons.Fox.v3.C1I1        | cis.Tra2.I2                   | cis.UGrich.v2.I2              | cis.CUGBP.n2.I2                  |
| cisCons.Fox.v1.C1I1        | cis.CUGBP.n2.I2               | cis.CUGBP.n2.I2               | cis.CUGBP.n3.I2                  |
| cisCons.Nova.NISE2         | cis.CUGBP.n3.I2               | cis.CUGBP.n3.I2               | cis.MBNL.v2.I2                   |
| cisCons.Nova.NISS1         | cis.Quak.I2                   | cis.MBNL.v3.I2                | Len.C1                           |
| cisCons.Nova.NISS2         | cis.MBNL.v2.I2                | cis.PTB.v3.I2                 | cis.MBNL.v3.I2                   |
| cisCons.UGrich.v2.I2       | cis.MBNL.v3.I2                | Len.A                         | cis.Grich.I2                     |

|                                     |                                   |                                    |                                   |
|-------------------------------------|-----------------------------------|------------------------------------|-----------------------------------|
| cisCons.CELFluke.I2                 | cis.Trich.WithC.I2                | cis.Fox.v2.I1                      | cis.PTB.v1.I2                     |
| cisCons.Quak.I2                     | cis.PTB.v2.I2                     | cis.GUrich.v1.I1                   | cis.PTB.v2.I2                     |
| cisCons.MBNL.v3.I2                  | cis.GUrich.v1.I1                  | cis.Tra2.I1                        | Len.A                             |
| cisCons.Fox.v1.I2                   | cis.GUrich.v2.I1                  | cis.CUGBP.n2.I1                    | cis.Fox.v2.I1                     |
| cisCons.PTB.v2.I2                   | cis.Tra2.I1                       | cis.MBNL.v1.I1                     | cis.Fox.v3.I1                     |
| Frame.noShift.NaN                   | Len.C2                            | cis.MBNL.v3.I1                     | cis.GUrich.v1.I1                  |
| AltAGpos                            | cis.CUGBP.n2.I1                   | cis.PTB.v1.I1                      | cis.GUrich.v4.I1                  |
| cisCons.YeoClustDown.20.TGCATG.I2   | cis.MBNL.v2.I1                    | cis.PTB.v2.I1                      | cis.CUGBP.n3.I1                   |
| cisCons.YeoClustDown.29.ACTAAC.I2   | cis.PTB.v2.I1                     | cis.PTB.v3.I1                      | cis.PTB.v2.I1                     |
| Cons.MeanP1_100.I1                  | cis.PTB.v3.I1                     | cis.PTB.v4.I1                      | Len.I1                            |
| cisCons.YeoClustDown.47.GTACTGT.I2  | cisCons.Nova.AI2_C2I2             | cisCons.Nova.AI2_C2I2              | cis.PTB.v4.I1                     |
| cisCons.YeoClustDown.50.GCATG.I2    | cisCons.Nova.C1I1_AI1             | cisCons.CUGBP.n3.I1I2              | cisCons.Nova.C1I1_AI1             |
| Cons.MeanP1_100.I2                  | cisCons.CUGBP.n2.I1I2             | cisCons.PTB.v3.I1I2                | cisCons.Nova.NISE3                |
| cisCons.YeoClustDown.53.CTGACT.I2   | cisCons.Nova.I1I2                 | cisCons.PTB.v4.I1I2                | cisCons.CUGBP.n2.I1I2             |
| cisCons.YeoClustDown.57.TTGGTT.I2   | cisCons.Fox.v1.I1I2               | cisCons.Nova.NISE2                 | cisCons.Nova.I1I2                 |
| cisCons.YeoClustDown.66.TTCACAG.I2  | cisCons.PTB.v2.I1I2               | cisCons.Nova.NISS1                 | cisCons.Fox.v1.I1I2               |
| cisCons.YeoClustDown.68.TCTGG.I2    | cisCons.PTB.v3.I1I2               | cisCons.Nova.NISS2                 | cisCons.PTB.v2.I1I2               |
| cisCons.YeoClustDown.73.GTGAG.I2    | cisCons.Fox.v3.C1I1               | cisCons.GUrich.v1.I2               | cisCons.PTB.v3.I1I2               |
| cisCons.YeoClustDown.74.TTCTGT.I2   | cisCons.Nova.NISS1                | Len.Ratio.A_I2                     | cisCons.Nova.NESE1_NESS2          |
| SecStr.maxJunc.AI1                  | Len.Ratio.A_I1                    | cisCons.CUGBP.n3.I2                | cisCons.Fox.v2.C1I1               |
| cisCons.YeoClustDown.97.AAATT.I2    | cisCons.Fox.v1.C2I2               | cisCons.MBNL.v1.I2                 | cisCons.Nova.NISE2                |
| cisCons.YeoClustDown.99.TTCTCT.I2   | cisCons.Nova.NISS2                | cisCons.MBNL.v2.I2                 | cisCons.Nova.NISE1                |
| cisCons.YeoClustDown.103.TGTTTAA.I2 | cisCons.Fox.v2.I2                 | cisCons.MBNL.v3.I2                 | cisCons.Nova.NISS1                |
| SecStr.avgJunc.AI2                  | cisCons.GUrich.v1.I2              | cisCons.Grich.I2                   | Len.Ratio.A_I1                    |
| cisCons.YeoClustDown.115.TGTCT.I2   | cisCons.GUrich.v2.I2              | cisCons.Trich.WithG.I2             | cisCons.Fox.v1.C2I2               |
| cisCons.YeoClustDown.122.GCTTCT.I2  | cisCons.GUrich.v3.I2              | cisCons.PTB.v2.I2                  | cisCons.Nova.NISS2                |
| cisCons.YeoClustDown.123.TTCTAA.I2  | cisCons.UGrich.v2.I2              | Frame.noShift.NaN                  | cisCons.GUrich.v2.I2              |
| cisCons.YeoClustDown.127.TGCTAA.I2  | cisCons.CUGBP.n2.I2               | AltAGpos                           | cisCons.Tra2.I2                   |
| cisCons.YeoClustDown.141.AGTAT.I2   | cisCons.CUGBP.n3.I2               | cisCons.YeoClustDown.1.GTAAC.I2    | cisCons.CUGBP.n2.I2               |
| cisCons.YeoClustDown.143.TGCCTTT.I2 | cisCons.CELFluke.I2               | cisCons.YeoClustDown.8.AATTG.I2    | cisCons.CUGBP.n3.I2               |
| cisCons.YeoClustDown.151.CTTTCA.I2  | cisCons.Quak.I2                   | cisCons.YeoClustDown.9.CTGCT.I2    | cisCons.Quak.I2                   |
| cisCons.YeoClustDown.157.TCTGC.I2   | cisCons.MBNL.v1.I2                | cisCons.YeoClustDown.19.TCATTTT.I2 | cisCons.MBNL.v1.I2                |
| cisCons.CUGBP.n2.I1                 | cisCons.MBNL.v2.I2                | cisCons.YeoClustDown.20.TGCATG.I2  | cisCons.MBNL.v2.I2                |
| cisCons.MBNL.v3.I1                  | cisCons.MBNL.v3.I2                | cisCons.YeoClustDown.25.ATAATT.I2  | cisCons.MBNL.v3.I2                |
| cisCons.Sugnet.I1                   | Len.Ratio.I1_I2                   | cisCons.YeoClustDown.27.GTATCCT.I2 | Len.Ratio.I1_I2                   |
| cisCons.PTB.v2.I1                   | cisCons.Nova.I2                   | Cons.MeanP1_100.C2I2               | cisCons.Nova.I2                   |
| cisCons.YeoClustUp.5.TAACC.I1       | cisCons.Trich.WithC.I2            | cisCons.YeoClustDown.32.TTAGCA.I2  | cisCons.Grich.I2                  |
| cisCons.YeoClustUp.22.CTAAC.I1      | cisCons.Fox.v1.I2                 | cisCons.YeoClustDown.34.TAATG.I2   | cisCons.Fox.v1.I2                 |
| cisCons.YeoClustUp.24.TCTTC.I1      | cisCons.PTB.v2.I2                 | cisCons.YeoClustDown.35.TTTTGAT.I2 | cisCons.PTB.v1.I2                 |
| cisCons.YeoClustUp.25.TGCATG.I1     | cisCons.PTB.v3.I2                 | cisCons.YeoClustDown.38.TATTTC.I2  | cisCons.PTB.v3.I2                 |
| cisCons.YeoClustUp.28.TTTATC.I1     | cisCons.PTB.v4.I2                 | cisCons.YeoClustDown.39.TAACT.I2   | Frame.noShift.NaN                 |
| cisCons.YeoClustUp.34.TTTCAG.I1     | Frame.noShift.NaN                 | cisCons.YeoClustDown.40.TGAGG.I2   | AltAGpos                          |
| cisCons.YeoClustUp.45.TTCAAAA.I1    | AltAGpos                          | cisCons.YeoClustDown.43.TATCCT.I2  | cisCons.YeoClustDown.2.AAGTGT.I2  |
| cisCons.YeoClustUp.55.GCTTTGC.I1    | cisCons.YeoClustDown.2.AAGTGT.I2  | cisCons.YeoClustDown.47.GTACTGT.I2 | cisCons.YeoClustDown.4.ATTAACA.I2 |
| cisCons.YeoClustUp.58.ACTAAT.I1     | cisCons.YeoClustDown.3.GTTTGT.I2  | cisCons.YeoClustDown.48.TTAAG.I2   | cisCons.YeoClustDown.7.TTGAAAT.I2 |
| cisCons.YeoClustUp.64.TCTTT.I1      | cisCons.YeoClustDown.6.TAACC.I2   | cisCons.YeoClustDown.49.CATAAA.I2  | cisCons.YeoClustDown.8.AATTG.I2   |
| cisCons.YeoClustUp.68.CTCTG.I1      | cisCons.YeoClustDown.7.TTGAAAT.I2 | cisCons.YeoClustDown.50.GCATG.I2   | cisCons.YeoClustDown.9.CTGCT.I2   |
| cisCons.YeoClustUp.71.TTTTCC.I1     | cisCons.YeoClustDown.10.TTTATG.I2 | Cons.MeanP1_100.I2                 | AltGTpos                          |



|                                  |                                     |                                     |                                    |
|----------------------------------|-------------------------------------|-------------------------------------|------------------------------------|
| cisCons.YeoClustUp.72.TTTTGC.I1  | AltGTpos                            | cisCons.YeoClustDown.54.ACTAAT.I2   | cisCons.YeoClustDown.12.ATGTTT.I2  |
| cisCons.YeoClustUp.80.TGGCTT.I1  | cisCons.YeoClustDown.13.TTTCCAA.I2  | cisCons.YeoClustDown.55.GAGTA.I2    | cisCons.YeoClustDown.16.GTACGT.I2  |
| cisCons.YeoClustUp.91.ATTAAAT.I1 | cisCons.YeoClustDown.14.AAGTC.I2    | cisCons.YeoClustDown.56.TCTTAA.I2   | cisCons.YeoClustDown.17.GTTAAA.I2  |
| SecStr.avg1_70.A11               | cisCons.YeoClustDown.16.GTACGT.I2   | cisCons.YeoClustDown.59.AGAGCCA.I2  | cisCons.YeoClustDown.20.TGCATG.I2  |
| cisCons.YeoClustUp.99.TTTAC.I1   | cisCons.YeoClustDown.19.TCATTTT.I2  | SecStr.maxJunc.C111                 | cisCons.YeoClustDown.22.TTTATC.I2  |
| SecStr.max71_140.A11             | cisCons.YeoClustDown.20.TGCATG.I2   | cisCons.YeoClustDown.62.GTATTT.I2   | cisCons.YeoClustDown.25.ATAATT.I2  |
| cisCons.YeoClustUp.102.TTCTAG.I1 | Cons.MeanP1_100.C111                | cisCons.YeoClustDown.68.TCTGG.I2    | cisCons.YeoClustDown.29.ACTAAC.I2  |
| cisCons.YeoClustUp.118.TCTCT.I1  | cisCons.YeoClustDown.21.TTCTT.I2    | cisCons.YeoClustDown.70.TGATTTG.I2  | cisCons.YeoClustDown.31.AATTGA.I2  |
| cisCons.YeoClustUp.121.TGTCT.I1  | cisCons.YeoClustDown.23.ACATTT.I2   | cisCons.YeoClustDown.73.GTGAG.I2    | cisCons.YeoClustDown.32.TTAGCA.I2  |
| cisCons.YeoClustUp.122.TTCCTT.I1 | cisCons.YeoClustDown.24.TGCCAGC.I2  | cisCons.YeoClustDown.74.TTCTGT.I2   | cisCons.YeoClustDown.33.CAAAT.I2   |
| cisCons.YeoClustUp.132.TCTGTT.I1 | cisCons.YeoClustDown.26.GTAGG.I2    | cisCons.YeoClustDown.79.TGGCTT.I2   | cisCons.YeoClustDown.34.TAATG.I2   |
| cisCons.YeoClustUp.148.TTGCTG.I1 | cisCons.YeoClustDown.29.ACTAAC.I2   | cisCons.YeoClustDown.80.TTAATCT.I2  | cisCons.YeoClustDown.39.TAACT.I2   |
| cisCons.YeoClustUp.152.TGCTT.I1  | cisCons.YeoClustDown.32.TTAGCA.I2   | SecStr.maxJunc.A11                  | cisCons.YeoClustDown.40.TGAGG.I2   |
| cis.ShortSeq.AG.C1               | cisCons.YeoClustDown.33.CAAAT.I2    | cisCons.YeoClustDown.81.AATTAT.I2   | Cons.MeanP1_100.I1                 |
| cis.ShortSeq.CA.C1               | cisCons.YeoClustDown.35.TTTTGAT.I2  | cisCons.YeoClustDown.85.GCAAGT.I2   | cisCons.YeoClustDown.42.TTTATA.I2  |
| cis.ESS.Burge.C1                 | cisCons.YeoClustDown.39.TAACT.I2    | cisCons.YeoClustDown.87.GTCTG.I2    | cisCons.YeoClustDown.43.TATCCT.I2  |
| cis.ShortSeq.CAG.C1              | Cons.MeanP1_100.I1                  | cisCons.YeoClustDown.89.TGCAT.I2    | cisCons.YeoClustDown.45.TTTACAG.I2 |
| PTC.UponInclusion.NaN            | cisCons.YeoClustDown.44.GTTAGT.I2   | SecStr.avgJunc.A11                  | cisCons.YeoClustDown.48.TTAAG.I2   |
| cis.ESS.Burge.C2                 | cisCons.YeoClustDown.45.TTTACAG.I2  | cisCons.YeoClustDown.93.GTTTT.I2    | cisCons.YeoClustDown.49.CATAAA.I2  |
| cis.ShortSeq.CTT.C1              | cisCons.YeoClustDown.46.TATTTG.I2   | cisCons.YeoClustDown.94.GCTTGGC.I2  | cisCons.YeoClustDown.50.GCATG.I2   |
| cis.ShortSeq.GTA.C1              | cisCons.YeoClustDown.48.TTAAG.I2    | cisCons.YeoClustDown.99.TTCTCT.I2   | Cons.MeanP1_100.I2                 |
| cis.ShortSeq.TTT.C1              | cisCons.YeoClustDown.50.GCATG.I2    | cisCons.YeoClustDown.100.TGAGAA.I2  | cisCons.YeoClustDown.57.TTGGTT.I2  |
| cis.ShortSeq.TA.C2               | Cons.MeanP1_100.I2                  | PTC.NotMined.NaN                    | cisCons.YeoClustDown.59.AGAGCCA.I2 |
| cis.ShortSeq.CAT.C2              | cisCons.YeoClustDown.51.TGATTA.I2   | SecStr.maxJunc.A12                  | SecStr.maxJunc.C111                |
| cis.ShortSeq.CCA.C2              | cisCons.YeoClustDown.53.CTGACT.I2   | cisCons.YeoClustDown.103.TGTTTAA.I2 | cisCons.YeoClustDown.63.TCAGA.I2   |
| PTC.UponExclusion.NaN            | cisCons.YeoClustDown.54.ACTAAT.I2   | cisCons.YeoClustDown.104.GTCAGT.I2  | cisCons.YeoClustDown.67.AGTAA.I2   |
| cis.ShortSeq.TCG.C2              | cisCons.YeoClustDown.57.TTGGTT.I2   | SecStr.avgJunc.A12                  | cisCons.YeoClustDown.68.TCTGG.I2   |
| cis.ShortSeq.CA.A                | cisCons.YeoClustDown.60.TCTTT.I2    | cisCons.YeoClustDown.111.TAATTTG.I2 | cisCons.YeoClustDown.70.TGATTTG.I2 |
| cis.ShortSeq.CC.A                | SecStr.maxJunc.C111                 | cisCons.YeoClustDown.112.GAAATA.I2  | SecStr.avgJunc.C111                |
| cis.ShortSeq.CG.A                | cisCons.YeoClustDown.62.GTATTT.I2   | cisCons.YeoClustDown.115.TGTCT.I2   | cisCons.YeoClustDown.71.TTTTGC.I2  |
| cis.ShortSeq.GA.A                | cisCons.YeoClustDown.66.TTCACAG.I2  | cisCons.YeoClustDown.119.TATGT.I2   | cisCons.YeoClustDown.72.TAGAAA.I2  |
| cis.ShortSeq.TG.A                | cisCons.YeoClustDown.68.TCTGG.I2    | cisCons.YeoClustDown.122.GCTTCT.I2  | cisCons.YeoClustDown.73.GTGAG.I2   |
| cis.ShortSeq.AAT.A               | cisCons.YeoClustDown.74.TTCTGT.I2   | cisCons.YeoClustDown.125.AGATTT.I2  | cisCons.YeoClustDown.75.GTAAG.I2   |
| cis.ShortSeq.ACA.A               | cisCons.YeoClustDown.79.TGGCTT.I2   | cisCons.YeoClustDown.126.GAAAAT.I2  | cisCons.YeoClustDown.78.TGAGC.I2   |
| cis.ShortSeq.ACT.A               | cisCons.YeoClustDown.80.TTAATCT.I2  | cisCons.YeoClustDown.129.CTTTGCT.I2 | cisCons.YeoClustDown.79.TGGCTT.I2  |
| cis.ShortSeq.AGA.A               | cisCons.YeoClustDown.83.CCACAG.I2   | cisCons.YeoClustDown.131.TTTCTC.I2  | cisCons.YeoClustDown.80.TTAATCT.I2 |
| cis.ShortSeq.ATG.A               | cisCons.YeoClustDown.85.GCAAGT.I2   | cisCons.YeoClustDown.133.TTTGCC.I2  | SecStr.maxJunc.A11                 |
| cis.ShortSeq.CAT.A               | cisCons.YeoClustDown.87.GTCTG.I2    | cisCons.YeoClustDown.135.TGTTCT.I2  | cisCons.YeoClustDown.82.TGAAAT.I2  |
| cis.ShortSeq.CCA.A               | cisCons.YeoClustDown.89.TGCAT.I2    | cisCons.YeoClustDown.139.TTGAGC.I2  | cisCons.YeoClustDown.83.CCACAG.I2  |
| cis.ShortSeq.CCC.A               | cisCons.YeoClustDown.90.GAGAAA.I2   | cisCons.YeoClustDown.143.TGCCTTT.I2 | cisCons.YeoClustDown.84.AAATGA.I2  |
| cis.ShortSeq.GCA.A               | cisCons.YeoClustDown.94.GCTTGGC.I2  | cisCons.YeoClustDown.145.GAGTG.I2   | cisCons.YeoClustDown.85.GCAAGT.I2  |
| cis.ShortSeq.GCT.A               | cisCons.YeoClustDown.97.AAATT.I2    | SecStr.avg1_70.C111                 | cisCons.YeoClustDown.86.GTAAAA.I2  |
| cis.ShortSeq.TCT.A               | cisCons.YeoClustDown.99.TTCTCT.I2   | cisCons.YeoClustDown.151.CTTTCA.I2  | cisCons.YeoClustDown.87.GTCTG.I2   |
| JuncScore.A11                    | cisCons.YeoClustDown.100.TGAGAA.I2  | cisCons.YeoClustDown.152.AAGAT.I2   | cisCons.YeoClustDown.89.TGCAT.I2   |
| cis.ShortSeq.TGT.A               | SecStr.maxJunc.A12                  | cisCons.YeoClustDown.154.GTGGGT.I2  | SecStr.avgJunc.A11                 |
| cis.ShortSeq.TTC.A               | cisCons.YeoClustDown.101.TTAGTT.I2  | cisCons.YeoClustDown.155.GTAAAG.I2  | cisCons.YeoClustDown.94.GCTTGGC.I2 |
| cis.ShortSeq.TTG.A               | cisCons.YeoClustDown.103.TGTTTAA.I2 | cisCons.YeoClustDown.158.CTAAA.I2   | cisCons.YeoClustDown.96.GTATG.I2   |
| cis.ShortSeq.C.I2                | cisCons.YeoClustDown.104.GTCAGT.I2  | SecStr.max71_140.C111               | cisCons.YeoClustDown.98.GTAAT.I2   |

|                      |                                     |                                  |                                     |
|----------------------|-------------------------------------|----------------------------------|-------------------------------------|
| cis.ShortSeq.AG.I2   | cisCons.YeoClustDown.108.TCCTTT.I2  | cisCons.GUrich.v3.I1             | cisCons.YeoClustDown.100.TGAGAA.I2  |
| cis.ShortSeq.CT.I2   | SecStr.avgJunc.AI2                  | cisCons.UGrich.v2.I1             | PTC.NotMined.NaN                    |
| cis.ShortSeq.ACT.I2  | cisCons.YeoClustDown.115.TGTCT.I2   | cisCons.MBNL.v1.I1               | cisCons.YeoClustDown.101.TTAGTT.I2  |
| cis.ShortSeq.GCT.I2  | cisCons.YeoClustDown.116.GTTGGT.I2  | SecStr.avg71_140.C1I1            | cisCons.YeoClustDown.104.GTCAGT.I2  |
| cis.PTB.v2.I1I2      | cisCons.YeoClustDown.123.TTCTAA.I2  | cisCons.MBNL.v2.I1               | cisCons.YeoClustDown.106.TAAATG.I2  |
| cis.ShortSeq.TGC.I2  | cisCons.YeoClustDown.124.GTTTCT.I2  | cisCons.Nova.I1                  | SecStr.avgJunc.AI2                  |
| cis.PTB.v4.I1I2      | cisCons.YeoClustDown.128.AAGCT.I2   | cisCons.Sugnet.I1                | cisCons.YeoClustDown.111.TAATTG.I2  |
| JuncScore.AI2        | cisCons.YeoClustDown.129.CTTTGCT.I2 | cisCons.PTB.v1.I1                | cisCons.YeoClustDown.112.GAAATA.I2  |
| cis.ShortSeq.GA.I1   | cisCons.YeoClustDown.130.TCTGA.I2   | cisCons.PTB.v3.I1                | cisCons.YeoClustDown.113.TGGTTT.I2  |
| cis.ShortSeq.TCC.I1  | SecStr.avgJunc.C2I2                 | cisCons.PTB.v4.I1                | cisCons.YeoClustDown.114.TGTTAA.I2  |
| cis.ShortSeq.TGC.I1  | cisCons.YeoClustDown.131.TTTCTC.I2  | cisCons.YeoClustUp.2.TCTCC.I1    | cisCons.YeoClustDown.115.TGTCT.I2   |
| cis.Nova.NISE2       | cisCons.YeoClustDown.133.TTTGCC.I2  | cisCons.YeoClustUp.5.TAACCC.I1   | cisCons.YeoClustDown.117.TGAATT.I2  |
| cis.ShortSeq.CG.C1I1 | cisCons.YeoClustDown.136.CTTTT.I2   | cisCons.YeoClustUp.7.AAGCCA.I1   | cisCons.YeoClustDown.118.AATTTA.I2  |
| cis.ShortSeq.GA.C2I2 | cisCons.YeoClustDown.139.TTGCAG.I2  | cisCons.YeoClustUp.8.AATTG.I1    | cisCons.YeoClustDown.119.TATGT.I2   |
|                      | SecStr.max1_70.C1I1                 | cisCons.YeoClustUp.14.TCCAG.I1   | cisCons.YeoClustDown.120.GCATTI.I2  |
|                      | cisCons.YeoClustDown.143.TGCCTTT.I2 | cisCons.YeoClustUp.20.CTTGAC.I1  | cisCons.YeoClustDown.122.GCTTCT.I2  |
|                      | cisCons.YeoClustDown.149.TGATTTT.I2 | cisCons.YeoClustUp.21.TTAAAAC.I1 | cisCons.YeoClustDown.125.AGATTT.I2  |
|                      | SecStr.avg1_70.C1I1                 | SecStr.max1_70.AI2               | cisCons.YeoClustDown.127.TGCTAA.I2  |
|                      | cisCons.YeoClustDown.151.CTTTCA.I2  | cisCons.YeoClustUp.22.CTAAC.I1   | cisCons.YeoClustDown.128.AAGCT.I2   |
|                      | cisCons.YeoClustDown.152.AAGAT.I2   | cisCons.YeoClustUp.23.AAAGCT.I1  | cisCons.YeoClustDown.129.CTTTGCT.I2 |
|                      | cisCons.YeoClustDown.153.TGCTT.I2   | cisCons.YeoClustUp.24.TCTTC.I1   | SecStr.avgJunc.C2I2                 |
|                      | cisCons.YeoClustDown.154.GTGGGT.I2  | cisCons.YeoClustUp.26.TTCTT.I1   | cisCons.YeoClustDown.133.TTTGCC.I2  |
|                      | cisCons.YeoClustDown.155.GTAAAG.I2  | cisCons.YeoClustUp.28.TTTATC.I1  | cisCons.YeoClustDown.135.TGTTCT.I2  |
|                      | cisCons.YeoClustDown.157.TCTGC.I2   | cisCons.YeoClustUp.38.TTTAAC.I1  | cisCons.YeoClustDown.139.TTGCAG.I2  |
|                      | cisCons.Fox.v2.I1                   | cisCons.YeoClustUp.40.AGAAAT.I1  | cisCons.YeoClustDown.140.TAATA.I2   |
|                      | cisCons.GUrich.v3.I1                | cisCons.YeoClustUp.43.TAAAAT.I1  | SecStr.max1_70.C1I1                 |
|                      | cisCons.MBNL.v1.I1                  | cisCons.YeoClustUp.47.CTTGTC.I1  | cisCons.YeoClustDown.141.AGTAT.I2   |
|                      | cisCons.MBNL.v2.I1                  | cisCons.YeoClustUp.49.TGGATTT.I1 | cisCons.YeoClustDown.142.ATTCT.I2   |
|                      | cisCons.MBNL.v3.I1                  | cisCons.YeoClustUp.51.TTAAG.I1   | cisCons.YeoClustDown.143.TGCCTTT.I2 |
|                      | cisCons.Sugnet.I1                   | cisCons.YeoClustUp.52.TTGGT.I1   | cisCons.YeoClustDown.147.CTTTA.I2   |
|                      | cisCons.PTB.v1.I1                   | cisCons.YeoClustUp.54.TGATTA.I1  | cisCons.YeoClustDown.149.TGATTTT.I2 |
|                      | cisCons.PTB.v2.I1                   | cisCons.YeoClustUp.58.ACTAAT.I1  | SecStr.avg1_70.C1I1                 |
|                      | cisCons.PTB.v3.I1                   | cisCons.YeoClustUp.59.CTGACT.I1  | cisCons.YeoClustDown.151.CTTTCA.I2  |
|                      | SecStr.max141_210.C1I1              | cisCons.YeoClustUp.63.TTTTGGC.I1 | cisCons.YeoClustDown.154.GTGGGT.I2  |
|                      | cisCons.YeoClustUp.2.TCTCC.I1       | cisCons.YeoClustUp.64.TCTTT.I1   | cisCons.YeoClustDown.157.TCTGC.I2   |
|                      | cisCons.YeoClustUp.6.TTGAAAT.I1     | cisCons.YeoClustUp.65.TTATTGA.I1 | cisCons.YeoClustDown.158.CTAAA.I2   |
|                      | cisCons.YeoClustUp.7.AAGCCA.I1      | cisCons.YeoClustUp.66.TCAGA.I1   | cisCons.Fox.v2.I1                   |
|                      | cisCons.YeoClustUp.9.CTGCT.I1       | cisCons.YeoClustUp.69.TCTGG.I1   | cisCons.Fox.v3.I1                   |
|                      | cisCons.YeoClustUp.10.TTTATG.I1     | cisCons.YeoClustUp.70.AATTC.I1   | cisCons.GUrich.v2.I1                |
|                      | cisCons.YeoClustUp.11.TTCACA.I1     | cisCons.YeoClustUp.72.TTTTGC.I1  | cisCons.GUrich.v4.I1                |
|                      | cisCons.YeoClustUp.12.TGATAA.I1     | cisCons.YeoClustUp.74.TCCATTT.I1 | cisCons.UGrich.v2.I1                |
|                      | cisCons.YeoClustUp.15.TTTCCAA.I1    | cisCons.YeoClustUp.76.CTTGATT.I1 | cisCons.CUGBP.n2.I1                 |
|                      | cisCons.YeoClustUp.18.TCTTG.I1      | cisCons.YeoClustUp.87.TCATTTC.I1 | SecStr.avg71_140.C1I1               |
|                      | cisCons.YeoClustUp.19.TTGTAI.I1     | cisCons.YeoClustUp.92.CCTGCAG.I1 | cisCons.MBNL.v2.I1                  |
|                      | cisCons.YeoClustUp.22.CTAAC.I1      | cisCons.YeoClustUp.96.CTTCT.I1   | cisCons.MBNL.v3.I1                  |
|                      | cisCons.YeoClustUp.23.AAAGCT.I1     | cisCons.YeoClustUp.97.TTAGAA.I1  | cisCons.Nova.I1                     |
|                      | cisCons.YeoClustUp.28.TTTATC.I1     | cisCons.YeoClustUp.98.TGTTTC.I1  | cisCons.Sugnet.I1                   |
|                      | cisCons.YeoClustUp.30.GCTGACC.I1    | SecStr.max71_140.A1I1            | cisCons.Fox.v1.I1                   |

|                                    |                                   |                                  |
|------------------------------------|-----------------------------------|----------------------------------|
| cisCons.YeoClustUp.35.TTAGCA.II    | cisCons.YeoClustUp.102.TTCTAG.II  | cisCons.PTB.v1.II                |
| cisCons.YeoClustUp.36.TTGCCT.II    | cisCons.YeoClustUp.105.TGAGAA.II  | cisCons.PTB.v4.II                |
| cisCons.YeoClustUp.38.TTTAAC.II    | cisCons.YeoClustUp.109.AAATCA.II  | cisCons.YeoClustUp.5.TAACC.II    |
| cisCons.YeoClustUp.40.AGAAAT.II    | cisCons.YeoClustUp.111.CTTGC.II   | cisCons.YeoClustUp.7.AAGCCA.II   |
| cisCons.YeoClustUp.41.TTTTGAT.II   | SecStr.avg71_140.AI1              | cisCons.YeoClustUp.8.AATTG.II    |
| cisCons.YeoClustUp.42.TAACT.II     | cisCons.YeoClustUp.118.TCTCT.II   | cisCons.YeoClustUp.9.CTGCT.II    |
| cisCons.YeoClustUp.49.TGGATT.II    | cisCons.YeoClustUp.121.TGTCT.II   | cisCons.YeoClustUp.12.TGATAA.II  |
| cisCons.YeoClustUp.50.TTGCATT.II   | SecStr.max141_210.AI1             | cisCons.YeoClustUp.14.TCCAG.II   |
| cisCons.YeoClustUp.52.TTGGT.II     | cisCons.YeoClustUp.122.TTCCTT.II  | cisCons.YeoClustUp.15.TTTCCAA.II |
| cisCons.YeoClustUp.57.TTTTAAA.II   | cisCons.YeoClustUp.124.AATTTA.II  | cisCons.YeoClustUp.18.TCTTG.II   |
| cisCons.YeoClustUp.61.CATTTA.II    | cisCons.YeoClustUp.125.GTTTCT.II  | PTC.ExcludedFromAnalysis.NaN     |
| cisCons.YeoClustUp.64.TCTTT.II     | cisCons.YeoClustUp.127.AGATTT.II  | cisCons.YeoClustUp.22.CTAAC.II   |
| cisCons.YeoClustUp.66.TCAGA.II     | cisCons.YeoClustUp.128.GAAAAT.II  | cisCons.YeoClustUp.23.AAAGCT.II  |
| cisCons.YeoClustUp.68.CTCTG.II     | cisCons.YeoClustUp.130.TTTGACT.II | cisCons.YeoClustUp.24.TCTTC.II   |
| cisCons.YeoClustUp.69.TCTGG.II     | cisCons.YeoClustUp.132.TCTGTT.II  | SecStr.avg1_70.AI2               |
| cisCons.YeoClustUp.72.TTTTGC.II    | cisCons.YeoClustUp.133.TTTATTC.II | cisCons.YeoClustUp.33.CATTTG.II  |
| cisCons.YeoClustUp.76.CTTGATT.II   | cisCons.YeoClustUp.134.TGAAAG.II  | cisCons.YeoClustUp.35.TTAGCA.II  |
| cisCons.YeoClustUp.77.GTAAG.II     | cisCons.YeoClustUp.137.ATTTGT.II  | cisCons.YeoClustUp.36.TTGCCT.II  |
| cisCons.YeoClustUp.79.AGAAAA.II    | cisCons.YeoClustUp.138.TGAGT.II   | cisCons.YeoClustUp.38.TTTAAC.II  |
| cisCons.YeoClustUp.80.TGGCTT.II    | cisCons.YeoClustUp.139.CCCCAG.II  | cisCons.YeoClustUp.41.TTTTGAT.II |
| cisCons.YeoClustUp.82.TGGAAAT.II   | cisCons.YeoClustUp.140.TTGCAG.II  | cisCons.YeoClustUp.42.TAACT.II   |
| cisCons.YeoClustUp.85.TCCTAG.II    | cisCons.YeoClustUp.142.TAATA.II   | cisCons.YeoClustUp.45.TTCAAAA.II |
| cisCons.YeoClustUp.89.AAATGA.II    | cisCons.YeoClustUp.143.TCTTA.II   | cisCons.YeoClustUp.48.TTTACAG.II |
| SecStr.avg1_70.AI1                 | cisCons.YeoClustUp.146.CTTTA.II   | cisCons.YeoClustUp.50.TTGCATT.II |
| cisCons.YeoClustUp.92.CCTGCAG.II   | cisCons.YeoClustUp.148.TTGCTG.II  | cisCons.YeoClustUp.51.TTAAG.II   |
| cisCons.YeoClustUp.93.TTACAG.II    | cisCons.YeoClustUp.151.TTCTC.II   | SecStr.avg71_140.AI2             |
| cisCons.YeoClustUp.94.AAATGT.II    | cisCons.YeoClustUp.152.TGCTT.II   | cisCons.YeoClustUp.52.TTGGT.II   |
| cisCons.YeoClustUp.95.TGCAT.II     | cisCons.YeoClustUp.155.GTAGGT.II  | cisCons.YeoClustUp.53.CATAAA.II  |
| cisCons.YeoClustUp.96.CTTCT.II     | cis.PSSM.SF2_ASF.C1               | cisCons.YeoClustUp.54.TGATTA.II  |
| cisCons.YeoClustUp.99.TTTAC.II     | cis.PSSM.SRp55.C1                 | cisCons.YeoClustUp.55.GCTTTGC.II |
| cisCons.YeoClustUp.105.TGAGAA.II   | cis.PSSM.SF2_ASF.A                | cisCons.YeoClustUp.56.ATTAG.II   |
| cisCons.YeoClustUp.110.TGTTGA.II   | cis.PSSM.SRp40.A                  | cisCons.YeoClustUp.58.ACTAAT.II  |
| cisCons.YeoClustUp.111.CTTGC.II    | cis.PSSM.SC35.C2                  | cisCons.YeoClustUp.60.ATATTT.II  |
| cisCons.YeoClustUp.113.CCTCT.II    | cis.PSSM.SRp40.C2                 | cisCons.YeoClustUp.61.CATTTA.II  |
| cisCons.YeoClustUp.116.TGTAA.II    | cis.PSSM.SRp55.I2                 | SecStr.max141_210.AI2            |
| cisCons.YeoClustUp.118.TCTCT.II    | cis.ShortSeq.AT.C1                | cisCons.YeoClustUp.62.AAATCT.II  |
| cisCons.YeoClustUp.121.TGTCT.II    | cis.ShortSeq.CC.C1                | cisCons.YeoClustUp.65.TTATTGA.II |
| cisCons.YeoClustUp.123.TGAATT.II   | cis.ShortSeq.GC.C1                | cisCons.YeoClustUp.66.TCAGA.II   |
| cisCons.YeoClustUp.125.GTTTCT.II   | cis.ShortSeq.TC.C1                | cisCons.YeoClustUp.68.CTCTG.II   |
| cisCons.YeoClustUp.129.GTTTAAAT.II | cis.ShortSeq.TG.C1                | cisCons.YeoClustUp.69.TCTGG.II   |
| SecStr.avg141_210.AI1              | cis.ShortSeq.AGC.C1               | cisCons.YeoClustUp.72.TTTTGC.II  |
| cisCons.YeoClustUp.132.TCTGTT.II   | cis.ShortSeq.CAG.C1               | cisCons.YeoClustUp.74.TCCATTT.II |
| cisCons.YeoClustUp.133.TTTATTC.II  | cis.ShortSeq.CCT.C1               | cisCons.YeoClustUp.76.CTTGATT.II |
| cisCons.YeoClustUp.136.CTTTT.II    | PTC.UponInclusion.NaN             | cisCons.YeoClustUp.77.GTAAG.II   |
| cisCons.YeoClustUp.137.ATTTGT.II   | cis.ShortSeq.CTA.C1               | cisCons.YeoClustUp.79.AGAAAA.II  |
| cisCons.YeoClustUp.139.CCCCAG.II   | cis.ShortSeq.CTC.C1               | cisCons.YeoClustUp.81.CTCAG.II   |
| SecStr.max1_70.C2I2                | cis.ShortSeq.CTT.C1               | SecStr.max1_70.AI1               |
| cisCons.YeoClustUp.143.TCTTA.II    | cis.ShortSeq.GAA.C1               | cisCons.YeoClustUp.82.TGGAAAT.II |

|                                  |                           |                                   |
|----------------------------------|---------------------------|-----------------------------------|
| cisCons.YeoClustUp.147.TTTAG.II  | cis.ShortSeq.GAC.C1       | cisCons.YeoClustUp.83.AATTAT.II   |
| cisCons.YeoClustUp.148.TGCTG.II  | cis.ShortSeq.GAT.C1       | cisCons.YeoClustUp.85.TCCTAG.II   |
| cisCons.YeoClustUp.150.CTTTCA.II | cis.ShortSeq.GCA.C1       | cisCons.YeoClustUp.88.AAAGCA.II   |
| cisCons.YeoClustUp.151.TTCTC.II  | cis.ShortSeq.GCC.C1       | cisCons.YeoClustUp.92.CCTGCAG.II  |
| cisCons.YeoClustUp.152.TGCTT.II  | cis.ShortSeq.GGA.C1       | cisCons.YeoClustUp.93.TTACAG.II   |
| cisCons.YeoClustUp.153.TCTGC.II  | cis.ESE.Burge.C1          | cisCons.YeoClustUp.96.CTTCT.II    |
| cisCons.YeoClustUp.155.GTAGGT.II | cis.ShortSeq.TAC.C1       | cisCons.YeoClustUp.101.CTTCCA.II  |
| cis.PSSM.SC35.C1                 | cis.ShortSeq.TAG.C1       | SecStr.max71_140.AII              |
| cis.PSSM.SC35.C2                 | cis.ShortSeq.TAT.C1       | cisCons.YeoClustUp.105.TGAGAA.II  |
| cis.PSSM.SF2_ASF.C2              | cis.ShortSeq.TGT.C1       | cisCons.YeoClustUp.107.GTCAGT.II  |
| cis.PSSM.SRp40.C2                | cis.ShortSeq.TTC.C1       | cisCons.YeoClustUp.111.CTTGC.II   |
| cis.PSSM.SRp40.II                | cis.ShortSeq.TTG.C1       | cisCons.YeoClustUp.113.CCTCT.II   |
| cis.ShortSeq.C.C1                | cis.ESS.Chasin.A          | cisCons.YeoClustUp.116.TGTTAA.II  |
| cis.ShortSeq.T.C1                | cis.ShortSeq.T.C2         | cisCons.YeoClustUp.118.TCTCT.II   |
| cis.ShortSeq.CA.C1               | cis.ShortSeq.AT.C2        | cisCons.YeoClustUp.119.TTAACA.II  |
| cis.ShortSeq.CC.C1               | cis.ShortSeq.GC.C2        | cisCons.YeoClustUp.120.TTTGGT.II  |
| cis.ShortSeq.CT.C1               | cis.ShortSeq.GT.C2        | cisCons.YeoClustUp.123.TGAATT.II  |
| cis.ShortSeq.GC.C1               | cis.ShortSeq.TG.C2        | cisCons.YeoClustUp.126.TGCTAA.II  |
| SecStr.avg141_210.C2I2           | cis.ShortSeq.ACA.C2       | cisCons.YeoClustUp.128.GAAAAT.II  |
| cis.ShortSeq.TC.C1               | cis.ShortSeq.ACT.C2       | cisCons.YeoClustUp.130.TTTGACT.II |
| cis.ShortSeq.TG.C1               | cis.ShortSeq.AGC.C2       | SecStr.avg141_210.AII             |
| cis.ShortSeq.TT.C1               | cis.ESE.Chasin.A          | cisCons.YeoClustUp.132.TCTGTT.II  |
| cis.ShortSeq.ACC.C1              | cis.ShortSeq.ATC.C2       | cisCons.YeoClustUp.138.TGAGT.II   |
| cis.ShortSeq.AGC.C1              | cis.ShortSeq.ATG.C2       | cisCons.YeoClustUp.142.TAATA.II   |
| cis.ShortSeq.ATA.C1              | cis.ShortSeq.CAA.C2       | cisCons.YeoClustUp.148.TTGCTG.II  |
| cis.ShortSeq.ATC.C1              | cis.ShortSeq.CCA.C2       | cisCons.YeoClustUp.151.TTCTC.II   |
| cis.ShortSeq.ATG.C1              | cis.ShortSeq.CCC.C2       | cisCons.YeoClustUp.155.GTAGGT.II  |
| cis.ESS.Burge.C1                 | cis.ShortSeq.CTC.C2       | cisCons.YeoClustUp.156.CTAAA.II   |
| cis.ShortSeq.CAG.C1              | cis.ShortSeq.CTG.C2       | cis.PSSM.SC35.C1                  |
| cis.ShortSeq.CAT.C1              | cis.ShortSeq.GCA.C2       | cis.PSSM.SRp55.C1                 |
| cis.ShortSeq.CCC.C1              | cis.ShortSeq.GGA.C2       | cis.PSSM.SF2_ASF.A                |
| PTC.UponInclusion.NaN            | PTC.UponeExclusion.NaN    | cis.PSSM.SRp55.A                  |
| cis.ESS.Burge.C2                 | cis.NovaClust.NESE1_NESS2 | cis.PSSM.SF2_ASF.C2               |
| cis.ShortSeq.CGC.C1              | cis.ShortSeq.GGG.C2       | cis.PSSM.SRp40.C2                 |
| cis.ShortSeq.CTA.C1              | cis.ShortSeq.GTG.C2       | cis.PSSM.SRp55.C2                 |
| cis.ShortSeq.CTC.C1              | cis.ShortSeq.GTT.C2       | cis.PSSM.SRp40.II                 |
| cis.ESE.Burge.A                  | cis.ShortSeq.TAG.C2       | cis.ShortSeq.C.C1                 |
| cis.ShortSeq.GAT.C1              | cis.ShortSeq.TTA.C2       | cis.ShortSeq.AT.C1                |
| cis.ShortSeq.GCC.C1              | cis.ShortSeq.TTG.C2       | cis.ShortSeq.CA.C1                |
| cis.ShortSeq.GGC.C1              | cis.ShortSeq.TTT.C2       | cis.ShortSeq.GG.C1                |
| cis.ShortSeq.GGG.C1              | cis.ShortSeq.AC.A         | SecStr.avg141_210.C2I2            |
| cis.ShortSeq.GTA.C1              | cis.ShortSeq.CT.A         | cis.ShortSeq.GT.C1                |
| cis.ShortSeq.GTC.C1              | cis.ShortSeq.GG.A         | cis.ShortSeq.TA.C1                |
| cis.ShortSeq.GTT.C1              | cis.ShortSeq.GT.A         | cis.ShortSeq.TC.C1                |
| cis.ShortSeq.TAA.C1              | cis.ShortSeq.TA.A         | cis.ShortSeq.TT.C1                |
| cis.ShortSeq.TAG.C1              | cis.ShortSeq.AAC.A        | cis.ShortSeq.AAC.C1               |
| cis.ShortSeq.TAT.C1              | cis.ShortSeq.ACC.A        | cis.ShortSeq.AAG.C1               |
| cis.ShortSeq.TCG.C1              | cis.ShortSeq.AGT.A        | cis.ShortSeq.AAT.C1               |

|                       |                     |                       |
|-----------------------|---------------------|-----------------------|
| cis.ESE.Burge.C2      | cis.ShortSeq.ATC.A  | cis.ShortSeq.ACA.C1   |
| cis.ShortSeq.TGA.C1   | cis.ShortSeq.CAC.A  | cis.ESS.Burge.A       |
| cis.ShortSeq.TGC.C1   | cis.ShortSeq.CAT.A  | cis.ShortSeq.ACC.C1   |
| cis.ShortSeq.TGT.C1   | cis.ShortSeq.CCC.A  | cis.ShortSeq.ACT.C1   |
| cis.ShortSeq.TTG.C1   | cis.ShortSeq.CCG.A  | cis.ShortSeq.AGA.C1   |
| cis.ShortSeq.C.C2     | cis.ShortSeq.CGA.A  | cis.ShortSeq.AGC.C1   |
| cis.ShortSeq.CA.C2    | cis.ShortSeq.CGC.A  | cis.ShortSeq.ATC.C1   |
| cis.ShortSeq.CT.C2    | cis.ShortSeq.CTA.A  | cis.ShortSeq.ATG.C1   |
| cis.ShortSeq.GT.C2    | cis.ShortSeq.CTC.A  | cis.ESS.Burge.C1      |
| cis.ShortSeq.TA.C2    | cis.ShortSeq.CTG.A  | cis.ShortSeq.ATT.C1   |
| cis.ShortSeq.TC.C2    | cis.ShortSeq.GAA.A  | cis.ShortSeq.CAA.C1   |
| cis.ShortSeq.AAG.C2   | cis.ShortSeq.GAG.A  | cis.ShortSeq.CAG.C1   |
| cis.ShortSeq.AAT.C2   | cis.ShortSeq.GAT.A  | cis.ShortSeq.CCA.C1   |
| cis.ShortSeq.ACA.C2   | cis.ShortSeq.GCA.A  | cis.ShortSeq.CCT.C1   |
| cis.ShortSeq.ACC.C2   | cis.ShortSeq.GCG.A  | PTC.UponInclusion.NaN |
| cis.ShortSeq.ACT.C2   | cis.ShortSeq.GCT.A  | cis.ShortSeq.GAA.C1   |
| cis.ShortSeq.AGG.C2   | cis.ShortSeq.GGG.A  | cis.ShortSeq.GAG.C1   |
| cis.ShortSeq.CAG.C2   | cis.ShortSeq.GTG.A  | cis.ESE.Burge.A       |
| cis.ShortSeq.CAT.C2   | cis.ShortSeq.GTT.A  | cis.ShortSeq.GAT.C1   |
| cis.ShortSeq.CCC.C2   | cis.ShortSeq.TAG.A  | cis.ShortSeq.GCA.C1   |
| cis.ShortSeq.CGA.C2   | cis.ShortSeq.TCC.A  | cis.ShortSeq.GCT.C1   |
| cis.ShortSeq.CGC.C2   | cis.ShortSeq.TCG.A  | cis.ShortSeq.GGG.C1   |
| cis.ShortSeq.CGG.C2   | cis.ShortSeq.TGA.A  | cis.ShortSeq.GGT.C1   |
| cis.ShortSeq.CTA.C2   | JuncScore.All       | cis.ShortSeq.GTA.C1   |
| cis.ShortSeq.CTC.C2   | cis.Nova.C1         | cis.ESE.Burge.C1      |
| cis.ESE.Chasin.C2     | cis.ShortSeq.TGT.A  | cis.ShortSeq.GTT.C1   |
| cis.ShortSeq.GAC.C2   | cis.ShortSeq.TTG.A  | cis.ShortSeq.TAC.C1   |
| cis.ShortSeq.GCC.C2   | cis.ShortSeq.TTT.A  | cis.ShortSeq.TAG.C1   |
| cis.ShortSeq.GGA.C2   | cis.ShortSeq.A.I2   | cis.ShortSeq.TAT.C1   |
| PTC.UponExclusion.NaN | cis.Nova.NISE3      | cis.ShortSeq.TCA.C1   |
| cis.ShortSeq.GGT.C2   | cis.ShortSeq.AC.I2  | cis.ShortSeq.TCC.C1   |
| cis.ShortSeq.TAC.C2   | cis.ShortSeq.CA.I2  | cis.ShortSeq.TCT.C1   |
| cis.NovaClust.NESS1   | cis.ShortSeq.CG.I2  | cis.ShortSeq.TGA.C1   |
| cis.ShortSeq.TCG.C2   | cis.ShortSeq.CT.I2  | cis.ShortSeq.TGG.C1   |
| cis.ShortSeq.TGC.C2   | cis.CUGBP.n2.II2    | cis.ShortSeq.TTA.C1   |
| cis.ShortSeq.TGT.C2   | cis.ShortSeq.TC.I2  | cis.ShortSeq.A.C2     |
| cis.NovaClust.NISE1   | cis.ShortSeq.TG.I2  | cis.ShortSeq.AT.C2    |
| cis.ShortSeq.TTC.C2   | cis.ShortSeq.AAA.I2 | cis.ESS.Chasin.C1     |
| cis.ShortSeq.TTT.C2   | cis.ShortSeq.AAC.I2 | cis.ShortSeq.TA.C2    |
| cis.ShortSeq.AG.A     | cis.CUGBP.n3.II2    | cis.ShortSeq.TT.C2    |
| cis.NovaClust.NISE2   | cis.ShortSeq.ACG.I2 | cis.ShortSeq.AAT.C2   |
| cis.ShortSeq.CA.A     | cis.ShortSeq.AGC.I2 | cis.ShortSeq.ACC.C2   |
| cis.ShortSeq.CC.A     | cis.ShortSeq.ATC.I2 | cis.ShortSeq.ACG.C2   |
| cis.ShortSeq.CG.A     | cis.ShortSeq.CAC.I2 | cis.ShortSeq.AGA.C2   |
| cis.ShortSeq.CT.A     | cis.ShortSeq.CGA.I2 | cis.ShortSeq.AGG.C2   |
| cis.ShortSeq.GA.A     | cis.ShortSeq.CGT.I2 | cis.ShortSeq.ATC.C2   |
| cis.ShortSeq.TA.A     | cis.PTB.v1.III2     | cis.ShortSeq.ATT.C2   |
| cis.ShortSeq.AAA.A    | cis.ShortSeq.GAC.I2 | cis.ShortSeq.CAA.C2   |

---

|                     |                      |                           |
|---------------------|----------------------|---------------------------|
| cis.ShortSeq.AAT.A  | cis.ShortSeq.GCT.I2  | cis.ShortSeq.CAG.C2       |
| cis.ShortSeq.ACA.A  | cis.ShortSeq.GTT.I2  | cis.ShortSeq.CAT.C2       |
| cis.ShortSeq.ACG.A  | cis.ShortSeq.TAG.I2  | cis.ShortSeq.CCA.C2       |
| cis.ShortSeq.ACT.A  | cis.ShortSeq.TCA.I2  | cis.ShortSeq.CCC.C2       |
| cis.ShortSeq.ATG.A  | cis.ShortSeq.TCT.I2  | cis.ShortSeq.CCG.C2       |
| cis.ShortSeq.ATT.A  | cis.ShortSeq.TGA.I2  | cis.ShortSeq.CGG.C2       |
| cis.ShortSeq.CCC.A  | cis.ShortSeq.TGT.I2  | cis.ShortSeq.CTA.C2       |
| cis.ShortSeq.CCG.A  | cis.ShortSeq.TTA.I2  | cis.ShortSeq.CTC.C2       |
| cis.ShortSeq.CGC.A  | cis.PTB.v4.II12      | cis.ESE.Chasin.C2         |
| cis.Nova.NESS1      | cis.ShortSeq.AC.I1   | cis.ShortSeq.CTT.C2       |
| cis.ShortSeq.CTG.A  | cis.ShortSeq.CA.I1   | cis.ShortSeq.GAC.C2       |
| cis.ShortSeq.CTT.A  | JuncScore.AI2        | cis.ShortSeq.GCC.C2       |
| cis.ShortSeq.GAC.A  | cis.ShortSeq.TC.I1   | cis.ShortSeq.GCG.C2       |
| cis.ShortSeq.GTC.A  | cis.ShortSeq.AAC.I1  | cis.ShortSeq.GGA.C2       |
| cis.ShortSeq.TAG.A  | cis.ShortSeq.AAG.I1  | PTC.UponeExclusion.NaN    |
| cis.ShortSeq.TCG.A  | cis.ShortSeq.ACA.I1  | cis.NovaClust.NESE1_NESS2 |
| JuncScore.AI1       | cis.ShortSeq.ACT.I1  | cis.ShortSeq.GGC.C2       |
| cis.ShortSeq.TTC.A  | cis.ShortSeq.AGC.I1  | cis.ShortSeq.GGG.C2       |
| cis.ShortSeq.TTG.A  | cis.ShortSeq.AGT.I1  | cis.ShortSeq.GGT.C2       |
| cis.ShortSeq.A.I2   | cis.ShortSeq.ATC.I1  | cis.ShortSeq.GTT.C2       |
| cis.ShortSeq.GA.I2  | cis.ShortSeq.CAA.I1  | cis.ShortSeq.TAC.C2       |
| cis.ShortSeq.GC.I2  | cis.ShortSeq.CAG.I1  | cis.ShortSeq.TAG.C2       |
| cis.ShortSeq.GT.I2  | cis.ShortSeq.CCC.I1  | cis.NovaClust.NESS1       |
| cis.ShortSeq.ACA.I2 | cis.ShortSeq.CGC.I1  | cis.ShortSeq.TAT.C2       |
| cis.ShortSeq.ACG.I2 | cis.ShortSeq.CTA.I1  | cis.ShortSeq.TCA.C2       |
| cis.ShortSeq.AGA.I2 | cis.Fox.v1.C111      | cis.ShortSeq.TCC.C2       |
| cis.ShortSeq.AGG.I2 | cis.Tra2.A           | cis.ShortSeq.TCG.C2       |
| cis.ShortSeq.ATC.I2 | cis.ShortSeq.TAC.I1  | cis.ShortSeq.TGG.C2       |
| cis.ShortSeq.CAA.I2 | cis.ShortSeq.TCT.I1  | cis.ShortSeq.TTA.C2       |
| cis.ShortSeq.CAC.I2 | cis.ShortSeq.TGG.I1  | cis.ShortSeq.TTG.C2       |
| cis.ShortSeq.CAG.I2 | cis.ShortSeq.TTG.I1  | cis.ShortSeq.TTT.C2       |
| cis.ShortSeq.CCG.I2 | cis.ShortSeq.AC.C111 | cis.ShortSeq.A.A          |
| cis.ShortSeq.CGC.I2 | cis.ShortSeq.CA.C111 | cis.ShortSeq.T.A          |
| cis.ShortSeq.CGT.I2 | cis.ShortSeq.CG.C111 | cis.ShortSeq.AC.A         |
| cis.ShortSeq.CTT.I2 | cis.Nova.NISE1       | cis.ShortSeq.AG.A         |
| cis.ShortSeq.GAA.I2 | cis.ShortSeq.GT.C111 | cis.NovaClust.NISE2       |
| cis.ShortSeq.GAT.I2 | cis.ShortSeq.TG.C111 | cis.ShortSeq.AT.A         |
| cis.ShortSeq.GCG.I2 | cis.ShortSeq.AA.C212 | cis.ShortSeq.CA.A         |
| cis.ShortSeq.GGC.I2 | cis.ShortSeq.AC.C212 | cis.ShortSeq.CC.A         |
| cis.ShortSeq.GGT.I2 | cis.ShortSeq.AG.C212 | cis.ShortSeq.CG.A         |
| cis.ShortSeq.GTA.I2 | cis.ShortSeq.GA.C212 | cis.ShortSeq.CT.A         |
| cis.ShortSeq.GTC.I2 | cis.ShortSeq.TC.C212 | cis.ShortSeq.TA.A         |
| cis.ShortSeq.GTG.I2 | cis.ShortSeq.TG.C212 | cis.NovaClust.NISE3       |
| cis.ShortSeq.TAC.I2 |                      | cis.ShortSeq.TC.A         |
| cis.ShortSeq.TAG.I2 |                      | cis.ShortSeq.TG.A         |
| cis.ShortSeq.TCG.I2 |                      | cis.ShortSeq.TT.A         |
| cis.PTB.v4.II12     |                      | cis.ShortSeq.AAC.A        |
| cis.ShortSeq.A.I1   |                      | cis.ShortSeq.ACA.A        |

---

---

|                      |                     |
|----------------------|---------------------|
| cis.ShortSeq.C.I1    | cis.ShortSeq.ACC.A  |
| cis.ShortSeq.AG.I1   | cis.ShortSeq.ACT.A  |
| JuncScore.AI2        | cis.ShortSeq.AGA.A  |
| cis.ShortSeq.GT.I1   | cis.ShortSeq.AGC.A  |
| cis.ShortSeq.TC.I1   | cis.ShortSeq.AGG.A  |
| cis.ShortSeq.AAC.I1  | cis.ShortSeq.ATA.A  |
| cis.ShortSeq.AAG.I1  | cis.ShortSeq.ATC.A  |
| cis.ShortSeq.ACA.I1  | cis.ShortSeq.ATG.A  |
| cis.ShortSeq.AGA.I1  | cis.ShortSeq.CAT.A  |
| cis.ShortSeq.AGT.I1  | cis.ShortSeq.CCA.A  |
| cis.ShortSeq.CAA.I1  | cis.ShortSeq.CCC.A  |
| cis.Fox.v3.C1I1      | cis.ShortSeq.CGA.A  |
| cis.ShortSeq.CCC.I1  | cis.ShortSeq.CTT.A  |
| cis.ShortSeq.CCG.I1  | cis.ShortSeq.GAA.A  |
| cis.ShortSeq.CTA.I1  | cis.ShortSeq.GAT.A  |
| cis.Fox.v1.C1I1      | cis.ShortSeq.GCC.A  |
| cis.ShortSeq.CTC.I1  | cis.ShortSeq.GCT.A  |
| cis.ShortSeq.GAA.I1  | cis.ShortSeq.GGT.A  |
| cis.ShortSeq.GAC.I1  | cis.ShortSeq.GTA.A  |
| cis.ShortSeq.GCG.I1  | cis.ShortSeq.GTC.A  |
| cis.Tra2.A           | cis.ShortSeq.GTG.A  |
| cis.ShortSeq.GTT.I1  | cis.ShortSeq.TAC.A  |
| cis.Nova.A           | cis.ShortSeq.TAG.A  |
| cis.ShortSeq.TAG.I1  | cis.ShortSeq.TCA.A  |
| cis.ShortSeq.TCC.I1  | cis.ShortSeq.TCC.A  |
| cis.ShortSeq.TCG.I1  | cis.ShortSeq.TCT.A  |
| cis.ShortSeq.TCT.I1  | JuncScore.AI1       |
| cis.ShortSeq.TGA.I1  | cis.ShortSeq.TGT.A  |
| cis.ShortSeq.TGC.I1  | cis.ShortSeq.TTG.A  |
| cis.ShortSeq.TGG.I1  | cis.ShortSeq.T.I2   |
| cis.ShortSeq.TTC.I1  | cis.ShortSeq.AC.I2  |
| cis.Nova.NISE2       | cis.ShortSeq.CA.I2  |
| cis.ShortSeq.AG.C1I1 | cis.ShortSeq.CG.I2  |
| cis.ShortSeq.CC.C1I1 | cis.ShortSeq.CT.I2  |
| cis.ShortSeq.CT.C1I1 | cis.ShortSeq.TC.I2  |
| cis.Nova.NISE1       | cis.CUGBP.n3.I1I2   |
| cis.ShortSeq.GT.C1I1 | cis.ShortSeq.ACA.I2 |
| cis.ShortSeq.TG.C1I1 | cis.ShortSeq.ACC.I2 |
| cis.ShortSeq.TT.C1I1 | cis.ShortSeq.ACT.I2 |
| cis.ShortSeq.CA.C2I2 | cis.ShortSeq.AGA.I2 |
| cis.ShortSeq.CG.C2I2 | cis.ShortSeq.AGC.I2 |
| cis.ShortSeq.GA.C2I2 | cis.ShortSeq.AGG.I2 |
| cis.ShortSeq.TC.C2I2 | cis.ShortSeq.AGT.I2 |
|                      | cis.ShortSeq.ATA.I2 |
|                      | cis.ShortSeq.ATG.I2 |
|                      | cis.ShortSeq.CAA.I2 |
|                      | cis.ShortSeq.CCC.I2 |
|                      | cis.Fox.v1.I1I2     |

---

---

cis.ShortSeq.CGA.I2  
cis.ShortSeq.CGC.I2  
cis.ShortSeq.CGG.I2  
cis.ShortSeq.CGT.I2  
cis.ShortSeq.CTA.I2  
cis.ShortSeq.GAA.I2  
cis.ShortSeq.GAC.I2  
cis.ShortSeq.GAT.I2  
cis.ShortSeq.GCC.I2  
cis.ShortSeq.GCT.I2  
cis.ShortSeq.GGC.I2  
cis.ShortSeq.GGT.I2  
cis.ShortSeq.GTG.I2  
cis.ShortSeq.GTT.I2  
cis.ShortSeq.TAC.I2  
cis.ShortSeq.TAG.I2  
cis.ShortSeq.TCA.I2  
cis.PTB.v3.I1I2  
cis.ShortSeq.TCG.I2  
cis.ShortSeq.TCT.I2  
cis.ShortSeq.TGA.I2  
cis.ShortSeq.TGC.I2  
cis.ShortSeq.TGG.I2  
cis.ShortSeq.TTA.I2  
cis.ShortSeq.T.I1  
cis.ShortSeq.AA.I1  
cis.ShortSeq.AC.I1  
JuncScore.AI2  
cis.ShortSeq.CG.I1  
cis.ShortSeq.GA.I1  
cis.ShortSeq.AAC.I1  
cis.ShortSeq.AAG.I1  
cis.ShortSeq.ACC.I1  
cis.ShortSeq.ACT.I1  
cis.ShortSeq.AGA.I1  
cis.Fox.v2.C1I1  
cis.ShortSeq.AGC.I1  
cis.ShortSeq.AGT.I1  
cis.ShortSeq.ATC.I1  
cis.ShortSeq.ATG.I1  
cis.ShortSeq.CAC.I1  
cis.Fox.v3.C1I1  
cis.ShortSeq.CCA.I1  
cis.ShortSeq.CCG.I1  
cis.ShortSeq.CGC.I1  
cis.ShortSeq.CGG.I1  
cis.ShortSeq.CTA.I1  
cis.ShortSeq.GAA.I1

---



---

cis.ShortSeq.GCG.I1  
cis.Tra2.A  
cis.ShortSeq.GCT.I1  
cis.ShortSeq.GTC.I1  
cis.ShortSeq.GTG.I1  
cis.ShortSeq.TAC.I1  
cis.ShortSeq.TAG.I1  
cis.ShortSeq.TAT.I1  
cis.ShortSeq.TGA.I1  
cis.ShortSeq.TGC.I1  
cis.ShortSeq.TTC.I1  
cis.ShortSeq.AA.C1I1  
cis.ShortSeq.CT.C1I1  
cis.ShortSeq.GA.C1I1  
cis.ShortSeq.TC.C1I1  
cis.ShortSeq.AA.C2I2  
cis.ShortSeq.AC.C2I2  
cis.ShortSeq.CA.C2I2  
cis.ShortSeq.CG.C2I2  
cis.ShortSeq.CT.C2I2

---
